# Supplementary material
Source: PubMed Central journal article supplement (PMC3262594)
Supplement: NIHMS341068-supplement-Supp_Fig_S1-S4___Table_S1-_S7.pdf [file NIHMS341068-supplement-Supp_Fig_S1-S4___Table_S1-_S7.pdf]

## Supplementary Information

### **Guanine nucleotides differentially modulate backbone dynamics of the STAS domain of the SulP/SLC26 transport protein Rv1739c of *M. tuberculosis***

Alok K. Sharma, Liwen Ye, Seth L. Alper\*, and Alan C. Rigby\*<sup>1</sup>

Division of Molecular and Vascular Medicine, Renal Division, and Center for Vascular Biology Research, Beth Israel Deaconess Medical Center; Department of Medicine, Harvard Medical School, Boston, MA, 02215

\*Equal contributions.

<sup>1</sup>, Present address: ImClone Systems  
450 E. 29th St.  
New York, NY 10016

Correspondence to:

Email: aksharma@bidmc.harvard.edu; salper@bidmc.harvard.edu; alan.rigby@imclone.com

Figure S1: Sequence-specific rotational correlation times ( $\tau_e$ ) determined using filtered data sets of experimental  $^{15}\text{N}$  relaxation rates  $R_1$  and  $R_2$  of free STAS, GTP-bound STAS, and GDP-bound STAS. Filtering criteria are as detailed in Materials and Methods. STAS secondary structure is at top.

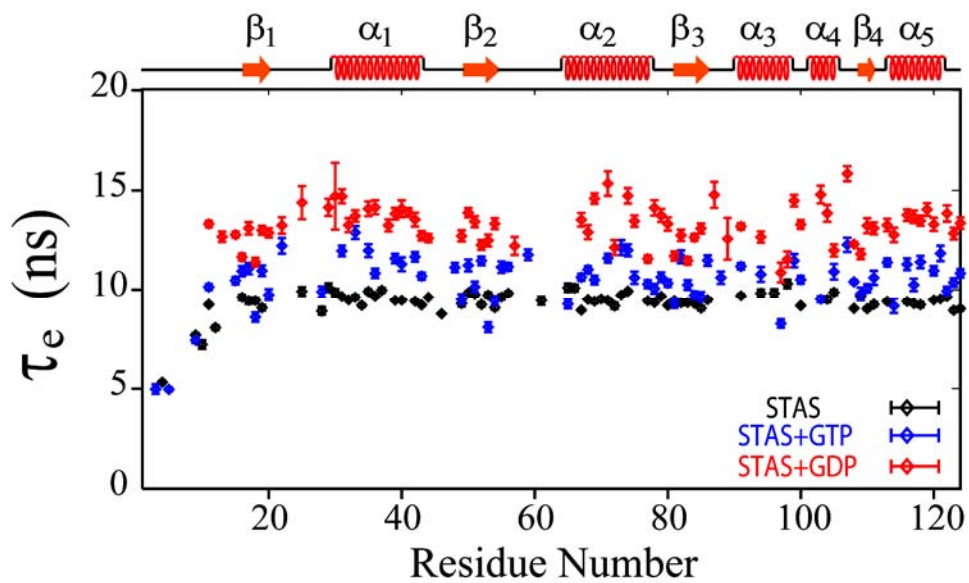

Figure S2: Residues with assigned models 1 to 5 obtained from deduction of model-free parameters from Rv1739c STAS  $^{15}\text{N}$  backbone relaxation data

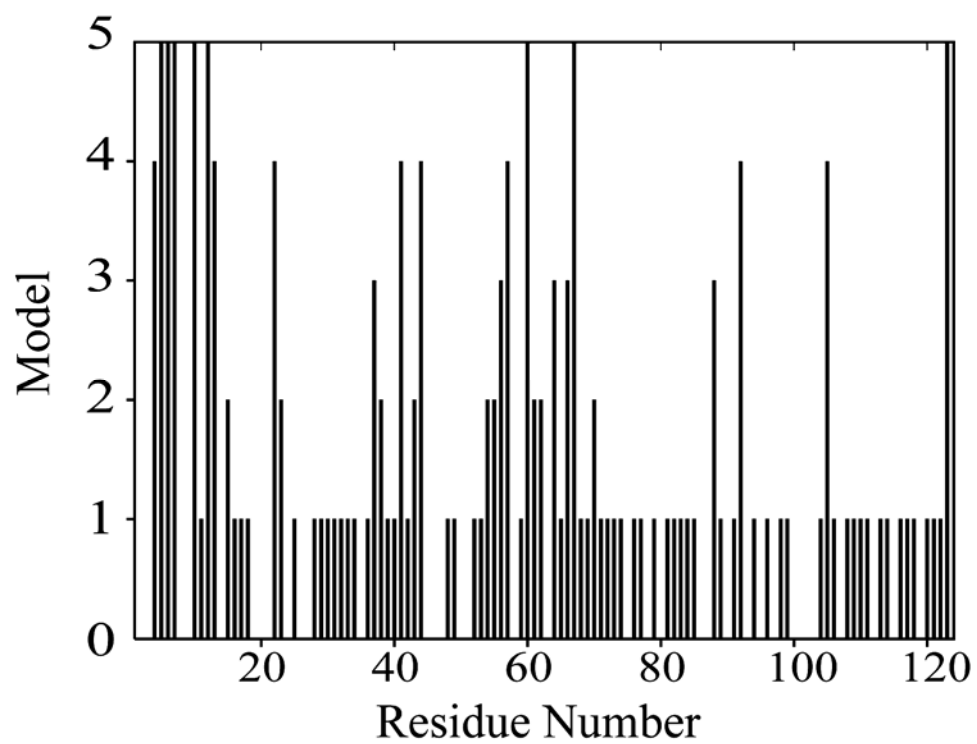

Table S1:  $^{15}\text{N}$  backbone relaxation data measured at 600.13 MHz and 300 K. Residue-specific longitudinal relaxation rate  $R_1$  ( $\text{sec}^{-1}$ ), transverse relaxation rate  $R_2$  ( $\text{sec}^{-1}$ ), and  $\{^1\text{H}\}$ - $^{15}\text{N}$  heteronuclear NOE of Rv1739c STAS in free-state and in complex with saturated concentrations of GTP and GDP. Errors in parameter measurement are shown as  $\delta$ parameter.

| STAS |       |              |       |              |      |                    | STAS+GTP |              |       |              |      |                    | STAS+GDP |              |       |              |      |                    |
|------|-------|--------------|-------|--------------|------|--------------------|----------|--------------|-------|--------------|------|--------------------|----------|--------------|-------|--------------|------|--------------------|
| Res  | $R_1$ | $\delta R_1$ | $R_2$ | $\delta R_2$ | NOE  | $\delta\text{NOE}$ | $R_1$    | $\delta R_1$ | $R_2$ | $\delta R_2$ | NOE  | $\delta\text{NOE}$ | $R_1$    | $\delta R_1$ | $R_2$ | $\delta R_2$ | NOE  | $\delta\text{NOE}$ |
| D3   | 1.34  | 0.08         | 3.21  | 0.16         | -    | -                  | 1.65     | 0.11         | 5.76  | 0.11         | -    | -                  | 1.44     | 0.08         | 7.45  | 0.18         | 0.54 | 0.10               |
| I4   | 1.78  | 0.04         | 4.53  | 0.05         | -    | -                  | 1.09     | 0.02         | 4.70  | 0.02         | -    | -                  | 1.48     | 0.03         | 4.78  | 0.03         | 0.16 | 0.02               |
| D5   | 1.66  | 0.03         | 4.66  | 0.06         | 0.10 | 0.02               | 1.65     | 0.04         | 5.77  | 0.03         | 0.08 | 0.02               | 1.58     | 0.04         | 5.33  | 0.03         | 0.04 | 0.03               |
| D6   | 1.59  | 0.03         | 5.05  | 0.08         | 0.31 | 0.02               | 1.65     | 0.04         | 5.50  | 0.03         | 0.29 | 0.02               | 1.54     | 0.04         | 6.17  | 0.03         | 0.47 | 0.02               |
| Y7   | 1.61  | 0.04         | 5.98  | 0.11         | 0.42 | 0.04               | 1.51     | 0.02         | 6.28  | 0.05         | 0.30 | 0.02               | 1.41     | 0.02         | 6.87  | 0.05         | 0.40 | 0.03               |
| Q9   | 1.61  | 0.05         | 8.90  | 0.17         | 0.81 | 0.03               | 1.24     | 0.04         | 7.96  | 0.10         | 0.84 | 0.04               | 0.98     | 0.03         | 8.57  | 0.07         | 0.26 | 0.02               |
| A10  | 1.50  | 0.08         | 7.05  | 0.37         | 0.65 | 0.03               | 1.62     | 0.03         | 8.50  | 0.07         | 0.46 | 0.02               | 1.38     | 0.02         | 8.11  | 0.07         | 0.39 | 0.02               |
| K11  | 1.39  | 0.04         | 13.03 | 0.34         | 0.79 | 0.02               | 1.22     | 0.03         | 13.33 | 0.20         | 0.75 | 0.02               | 1.03     | 0.02         | 18.65 | 0.44         | 0.80 | 0.03               |
| R12  | 1.48  | 0.06         | 9.32  | 0.29         | 0.66 | 0.07               | 1.34     | 0.03         | 8.97  | 0.10         | 0.49 | 0.03               | 1.28     | 0.02         | 10.18 | 0.13         | 0.35 | 0.03               |
| V13  | 1.36  | 0.07         | 14.75 | 0.74         | 0.55 | 0.06               | 1.29     | 0.06         | 11.04 | 0.34         | 0.55 | 0.04               | 1.10     | 0.04         | 18.12 | 0.60         | 0.84 | 0.07               |
| G15  | 1.34  | 0.04         | 12.22 | 0.33         | 0.64 | 0.03               | 1.21     | 0.04         | 13.99 | 0.30         | 0.68 | 0.03               | 0.99     | 0.02         | 16.50 | 0.36         | 0.83 | 0.04               |
| L16  | 1.37  | 0.04         | 14.47 | 0.59         | 0.79 | 0.03               | 1.35     | 0.06         | 16.96 | 0.42         | 0.81 | 0.04               | 1.06     | 0.03         | 14.98 | 0.40         | 0.80 | 0.04               |
| V17  | 1.33  | 0.06         | 13.26 | 0.67         | 0.99 | 0.05               | 1.25     | 0.06         | 16.07 | 0.57         | 0.85 | 0.05               | 1.05     | 0.04         | 18.41 | 0.75         | 0.78 | 0.06               |
| V18  | 1.31  | 0.05         | 13.16 | 0.57         | 0.77 | 0.03               | 1.33     | 0.06         | 10.85 | 0.39         | 0.97 | 0.06               | 1.02     | 0.03         | 13.81 | 0.49         | 0.65 | 0.05               |
| Y19  | 1.33  | 0.05         | 11.77 | 0.47         | 0.97 | 0.03               | 1.28     | 0.06         | 16.13 | 0.58         | 1.00 | 0.04               | 1.04     | 0.03         | 17.95 | 0.58         | 0.77 | 0.05               |
| R20  | 1.36  | 0.06         | 8.88  | 0.42         | 0.92 | 0.04               | 1.38     | 0.07         | 14.01 | 0.29         | 0.91 | 0.04               | 1.05     | 0.04         | 17.71 | 0.54         | 0.70 | 0.05               |
| Y21  | 1.42  | 0.07         | 20.91 | 1.37         | 0.90 | 0.05               | 1.24     | 0.07         | 28.85 | 2.55         | 0.69 | 0.06               | 0.97     | 0.06         | 25.53 | 3.27         | 0.84 | 0.09               |
| D22  | 1.39  | 0.07         | 15.22 | 0.98         | 0.61 | 0.03               | 1.42     | 0.08         | 21.79 | 1.28         | 0.79 | 0.04               | 1.11     | 0.06         | 19.84 | 1.09         | 0.91 | 0.07               |
| A23  | 1.16  | 0.02         | 11.16 | 0.29         | 0.69 | 0.03               | 1.05     | 0.03         | 13.52 | 0.25         | 0.38 | 0.03               | 0.93     | 0.02         | 14.54 | 0.28         | 0.48 | 0.04               |
| L25  | 1.38  | 0.07         | 16.04 | 0.82         | 0.76 | 0.03               | -        | -            | 15.90 | 0.44         | 1.12 | 0.09               | 1.07     | 0.05         | 22.41 | 2.47         | 0.77 | 0.06               |
| C26  | 1.42  | 0.07         | 33.40 | 3.52         | 0.81 | 0.09               | 0.66     | 0.02         | 16.81 | 0.89         | 0.74 | 0.07               | 1.01     | 0.07         | 26.36 | 2.69         | 0.46 | 0.16               |
| A28  | 1.42  | 0.07         | 11.86 | 0.78         | 0.76 | 0.05               | 1.23     | 0.06         | 12.85 | 0.41         | 1.07 | 0.08               | -        | -            | 11.63 | 0.87         | 0.75 | 0.07               |
| N29  | 1.39  | 0.06         | 17.23 | 1.13         | 0.84 | 0.04               | 1.09     | 0.04         | 23.89 | 0.90         | 0.75 | 0.05               | 1.09     | 0.06         | 22.11 | 1.28         | 0.84 | 0.06               |
| A30  | 1.32  | 0.06         | 15.03 | 1.01         | 0.97 | 0.07               | 1.09     | 0.07         | 22.68 | 1.98         | 0.96 | 0.08               | 1.10     | 0.10         | 23.85 | 4.98         | 1.22 | 0.14               |
| E31  | 1.37  | 0.03         | 14.64 | 0.36         | 0.85 | 0.02               | 1.17     | 0.03         | 17.29 | 0.64         | 0.83 | 0.02               | 0.96     | 0.02         | 20.82 | 0.92         | 0.80 | 0.03               |
| D32  | 1.31  | 0.03         | 13.29 | 0.35         | 0.77 | 0.03               | 1.12     | 0.03         | 15.12 | 0.56         | 0.89 | 0.03               | 1.02     | 0.02         | 18.17 | 0.93         | 0.83 | 0.04               |
| F33  | 1.31  | 0.04         | 13.78 | 0.54         | 0.86 | 0.02               | 1.20     | 0.06         | 20.28 | 1.00         | 0.89 | 0.04               | 1.04     | 0.04         | 19.76 | 0.79         | 0.80 | 0.04               |
| R34  | 1.25  | 0.03         | 11.50 | 0.35         | 0.92 | 0.02               | 1.17     | 0.04         | 8.29  | 0.15         | 0.45 | 0.02               | 0.99     | 0.02         | 7.22  | 0.09         | 0.42 | 0.03               |

| STAS |       |              |       |              |      |              | STAS+GTP |              |       |              |      |              | STAS+GDP |              |       |              |      |              |
|------|-------|--------------|-------|--------------|------|--------------|----------|--------------|-------|--------------|------|--------------|----------|--------------|-------|--------------|------|--------------|
| Res  | $R_1$ | $\delta R_1$ | $R_2$ | $\delta R_2$ | NOE  | $\delta$ NOE | $R_1$    | $\delta R_1$ | $R_2$ | $\delta R_2$ | NOE  | $\delta$ NOE | $R_1$    | $\delta R_1$ | $R_2$ | $\delta R_2$ | NOE  | $\delta$ NOE |
| R35  | 1.30  | 0.04         | 15.22 | 0.50         | 0.97 | 0.03         | 1.32     | 0.05         | 19.60 | 1.01         | 0.77 | 0.03         | 1.05     | 0.03         | 21.05 | 1.06         | 0.89 | 0.05         |
| R36  | 1.35  | 0.04         | 14.47 | 0.43         | 0.79 | 0.03         | 1.28     | 0.05         | 15.72 | 0.63         | 0.68 | 0.03         | 1.01     | 0.03         | 20.47 | 0.93         | 0.69 | 0.03         |
| A37  | 1.29  | 0.05         | 15.35 | 0.64         | 0.79 | 0.03         | 1.13     | 0.05         | 18.27 | 0.57         | 0.61 | 0.03         | 0.95     | 0.02         | 9.79  | 0.18         | 0.37 | 0.03         |
| L38  | 1.23  | 0.05         | 12.86 | 0.52         | 0.66 | 0.03         | 1.00     | 0.04         | 16.05 | 0.65         | 0.72 | 0.05         | 1.00     | 0.04         | 17.87 | 0.77         | 0.77 | 0.06         |
| T39  | 1.29  | 0.02         | 12.92 | 0.28         | 0.84 | 0.02         | 1.19     | 0.03         | 16.51 | 0.65         | 0.78 | 0.02         | 0.95     | 0.02         | 18.38 | 0.75         | 0.87 | 0.03         |
| V40  | 1.35  | 0.04         | 13.61 | 0.40         | 0.81 | 0.02         | 1.26     | 0.05         | 16.74 | 0.90         | 0.82 | 0.04         | 1.02     | 0.03         | 20.42 | 1.20         | 0.67 | 0.04         |
| V41  | 1.24  | 0.04         | 13.56 | 0.48         | 0.69 | 0.02         | 1.11     | 0.04         | 16.78 | 0.97         | 0.72 | 0.03         | 0.98     | 0.03         | 19.17 | 0.57         | 1.11 | 0.05         |
| D42  | 1.30  | 0.02         | 12.83 | 0.29         | 0.80 | 0.02         | 1.23     | 0.03         | 17.40 | 0.66         | 0.82 | 0.02         | 1.01     | 0.02         | 18.73 | 0.92         | 0.79 | 0.03         |
| Q43  | 1.30  | 0.02         | 12.03 | 0.24         | 0.68 | 0.02         | 1.19     | 0.02         | 14.27 | 0.41         | 0.72 | 0.02         | 1.00     | 0.02         | 16.61 | 0.58         | 0.93 | 0.03         |
| D44  | 1.28  | 0.02         | 13.48 | 0.29         | 0.69 | 0.02         | 1.27     | 0.02         | 15.18 | 0.40         | 0.60 | 0.02         | 1.02     | 0.02         | 16.64 | 0.53         | 0.81 | 0.03         |
| G46  | 1.32  | 0.02         | 10.53 | 0.17         | 0.79 | 0.02         | 1.32     | 0.02         | 11.96 | 0.31         | 0.62 | 0.02         | 0.99     | 0.02         | 14.19 | 0.36         | 0.59 | 0.03         |
| Q47  | 1.28  | 0.02         | 5.21  | 0.08         | -    | -            | 1.58     | 0.05         | 11.27 | 0.23         | 0.12 | 0.02         | 0.95     | 0.02         | 11.90 | 0.27         | 0.32 | 0.03         |
| V48  | 1.22  | 0.04         | 12.06 | 0.44         | 0.82 | 0.04         | 1.12     | 0.04         | 14.46 | 0.48         | 0.65 | 0.04         | 0.95     | 0.02         | 15.23 | 0.37         | 0.63 | 0.04         |
| E49  | 1.34  | 0.06         | 12.71 | 0.67         | 0.97 | 0.03         | 1.23     | 0.06         | 12.01 | 0.46         | 0.85 | 0.04         | 1.05     | 0.04         | 17.37 | 0.69         | 0.83 | 0.05         |
| W50  | 1.32  | 0.04         | 14.97 | 0.45         | 0.96 | 0.03         | 1.31     | 0.06         | 17.20 | 0.40         | 0.90 | 0.03         | 1.07     | 0.03         | 20.84 | 0.61         | 1.03 | 0.04         |
| F51  | 1.28  | 0.05         | 14.17 | 0.60         | 0.98 | 0.03         | 1.32     | 0.06         | 14.43 | 0.45         | 0.95 | 0.04         | 1.05     | 0.04         | 19.32 | 0.68         | 0.90 | 0.06         |
| V52  | 1.34  | 0.05         | 12.46 | 0.49         | 0.91 | 0.03         | 1.14     | 0.04         | 15.56 | 0.47         | 1.08 | 0.05         | 1.06     | 0.04         | 16.35 | 0.55         | 0.66 | 0.04         |
| L53  | 1.31  | 0.07         | 14.37 | 0.72         | 0.84 | 0.03         | 1.27     | 0.07         | 9.40  | 0.27         | 1.11 | 0.06         | 1.05     | 0.04         | 16.73 | 0.73         | 0.82 | 0.06         |
| N54  | 1.45  | 0.05         | 12.82 | 0.52         | 0.75 | 0.03         | 1.48     | 0.07         | 14.21 | 0.46         | 1.04 | 0.04         | 1.08     | 0.04         | 19.51 | 0.66         | 0.82 | 0.05         |
| A55  | 1.29  | 0.05         | 13.64 | 0.61         | 0.68 | 0.03         | 1.26     | 0.06         | 16.31 | 0.66         | 0.88 | 0.05         | 0.93     | 0.03         | 19.74 | 0.82         | 1.10 | 0.06         |
| E56  | 1.33  | 0.03         | 15.01 | 0.43         | 0.82 | 0.02         | 1.37     | 0.05         | 17.84 | 0.36         | 0.71 | 0.03         | 1.14     | 0.03         | 18.80 | 0.54         | 0.58 | 0.03         |
| S57  | 1.26  | 0.06         | 24.12 | 1.68         | 0.67 | 0.02         | 1.53     | 0.09         | 23.27 | 1.25         | 0.80 | 0.04         | 1.22     | 0.07         | 18.72 | 1.27         | 0.70 | 0.06         |
| V59  | 1.45  | 0.08         | 15.95 | 1.10         | 0.72 | 0.06         | 1.17     | 0.05         | 16.76 | 0.37         | 0.80 | 0.04         | 1.13     | 0.04         | 17.08 | 0.40         | 0.60 | 0.04         |
| E60  | 1.53  | 0.06         | 7.78  | 0.39         | 0.50 | 0.03         | 1.39     | 0.05         | 8.32  | 0.12         | 0.67 | 0.04         | 1.50     | 0.09         | 6.04  | 0.13         | 0.25 | 0.02         |
| V61  | 1.40  | 0.08         | 13.95 | 1.09         | 0.65 | 0.03         | 1.39     | 0.06         | -     | -            | 0.61 | 0.05         | 1.20     | 0.06         | -     | -            | 0.49 | 0.13         |
| D62  | 1.57  | 0.09         | 13.41 | 0.52         | 0.63 | 0.04         | -        | -            | 19.26 | 0.54         | 0.74 | 0.04         | 1.16     | 0.04         | 30.21 | 3.38         | 0.57 | 0.04         |
| L63  | 1.37  | 0.06         | 39.42 | 2.87         | 0.83 | 0.06         | 1.34     | 0.06         | -     | -            | 0.94 | 0.05         | 1.01     | 0.05         | -     | -            | 0.69 | 0.07         |
| T64  | 1.21  | 0.05         | 25.66 | 2.06         | 0.80 | 0.02         | -        | -            | -     | -            | 0.57 | 0.02         | 0.93     | 0.03         | 21.52 | 0.76         | 0.92 | 0.06         |
| A65  | 1.38  | 0.06         | 17.05 | 1.25         | 0.95 | 0.04         | 1.19     | 0.05         | 11.12 | 0.15         | 0.72 | 0.04         | 1.11     | 0.05         | -     | -            | 0.64 | 0.05         |
| L66  | 1.27  | 0.05         | 15.69 | 0.90         | 0.77 | 0.05         | 1.25     | 0.06         | 17.57 | 1.02         | 0.61 | 0.04         | 1.03     | 0.04         | 27.40 | 1.63         | 1.01 | 0.08         |
| D67  | 1.33  | 0.02         | 11.27 | 0.23         | 0.75 | 0.02         | 1.31     | 0.03         | 15.62 | 0.47         | 0.77 | 0.02         | 1.12     | 0.05         | 20.88 | 0.76         | 0.79 | 0.08         |
| A68  | 1.34  | 0.03         | 13.68 | 0.33         | 0.84 | 0.02         | 1.34     | 0.04         | 16.97 | 0.49         | 0.85 | 0.03         | 1.06     | 0.02         | 18.09 | 0.90         | 0.73 | 0.03         |

| STAS |       |              |       |              |      |              | STAS+GTP |              |       |              |      |              | STAS+GDP |              |       |              |      |              |
|------|-------|--------------|-------|--------------|------|--------------|----------|--------------|-------|--------------|------|--------------|----------|--------------|-------|--------------|------|--------------|
| Res  | $R_1$ | $\delta R_1$ | $R_2$ | $\delta R_2$ | NOE  | $\delta$ NOE | $R_1$    | $\delta R_1$ | $R_2$ | $\delta R_2$ | NOE  | $\delta$ NOE | $R_1$    | $\delta R_1$ | $R_2$ | $\delta R_2$ | NOE  | $\delta$ NOE |
| L69  | 1.34  | 0.04         | 13.21 | 0.50         | 0.95 | 0.03         | 1.16     | 0.04         | 13.51 | 0.49         | 0.79 | 0.04         | 1.01     | 0.03         | 21.62 | 0.71         | 1.10 | 0.06         |
| D70  | 1.27  | 0.04         | 13.10 | 0.46         | 0.73 | 0.03         | 1.40     | 0.03         | 10.99 | 0.41         | 0.63 | 0.06         | 1.05     | 0.01         | 10.23 | 0.26         | 0.77 | 0.02         |
| Q71  | 1.34  | 0.04         | 13.46 | 0.44         | 0.83 | 0.03         | 1.33     | 0.05         | 18.55 | 0.69         | 0.73 | 0.03         | 1.02     | 0.03         | 24.09 | 1.79         | 0.75 | 0.04         |
| L72  | 1.44  | 0.07         | 13.15 | 0.70         | 0.89 | 0.04         | 1.48     | 0.08         | 20.47 | 1            | 1.25 | 0.08         | 1.1      | 0.05         | 16.70 | 0.95         | 0.80 | 0.07         |
| R73  | 1.33  | 0.04         | 14.60 | 0.41         | 0.82 | 0.03         | 1.28     | 0.05         | 19.34 | 1.13         | 0.70 | 0.03         | 1.05     | 0.03         | 25.78 | 1.34         | 0.80 | 0.05         |
| T74  | 1.32  | 0.03         | 15.42 | 0.45         | 0.79 | 0.02         | 1.27     | 0.05         | 18.88 | 0.88         | 0.81 | 0.03         | 0.98     | 0.03         | 21.43 | 1.05         | 0.96 | 0.04         |
| E75  | 1.35  | 0.02         | 21.98 | 1.64         | 0.87 | 0.02         | 1.29     | 0.05         | 15.36 | 0.82         | 0.71 | 0.03         | 1.05     | 0.03         | 19.23 | 0.77         | 0.84 | 0.04         |
| L76  | 1.45  | 0.03         | 17.34 | 1.07         | 0.61 | 0.07         | 1.64     | 0.05         | 17.18 | 0.45         | 0.35 | 0.02         | 1.43     | 0.02         | 30.97 | 1.56         | 1.01 | 0.06         |
| L77  | 1.32  | 0.04         | 13.15 | 0.42         | 0.91 | 0.02         | 1.28     | 0.04         | 14.41 | 0.33         | 0.97 | 0.04         | 1.07     | 0.03         | 14.89 | 0.42         | 0.88 | 0.04         |
| R78  | 1.34  | 0.03         | 12.96 | 0.32         | 0.91 | 0.02         | 1.35     | 0.05         | 14.57 | 0.62         | 0.74 | 0.02         | 1.05     | 0.02         | 21.08 | 1.08         | 0.81 | 0.03         |
| R79  | 1.30  | 0.03         | 13.93 | 0.39         | 0.87 | 0.02         | 1.27     | 0.04         | 15.15 | 0.60         | 0.86 | 0.03         | 1.00     | 0.02         | 19.21 | 0.85         | 0.80 | 0.04         |
| G80  | 1.33  | 0.03         | 12.29 | 0.28         | 0.94 | 0.02         | 1.31     | 0.04         | 14.81 | 0.33         | 0.75 | 0.03         | 1.00     | 0.02         | 18.12 | 0.82         | 0.94 | 0.03         |
| I81  | 1.27  | 0.05         | 12.77 | 0.45         | 0.94 | 0.03         | 1.37     | 0.06         | 12.82 | 0.28         | 0.95 | 0.04         | 1.02     | 0.03         | 14.50 | 0.53         | 0.79 | 0.06         |
| V82  | 1.27  | 0.05         | 12.18 | 0.55         | 0.89 | 0.03         | 1.34     | 0.07         | 18.89 | 0.85         | 0.94 | 0.04         | 0.93     | 0.03         | 15.55 | 0.64         | 0.84 | 0.06         |
| F83  | 1.30  | 0.04         | 12.53 | 0.50         | 0.82 | 0.03         | 1.32     | 0.06         | 14.70 | 0.36         | 0.85 | 0.03         | 1.01     | 0.03         | 13.82 | 0.45         | 0.97 | 0.04         |
| A84  | 1.34  | 0.03         | 12.75 | 0.34         | 0.87 | 0.03         | 1.33     | 0.05         | 13.53 | 0.31         | 0.82 | 0.03         | 1.04     | 0.03         | 16.98 | 0.39         | 0.98 | 0.04         |
| M85  | 1.33  | 0.05         | 11.64 | 0.45         | 0.84 | 0.04         | 1.30     | 0.06         | 13.00 | 0.38         | 0.66 | 0.04         | 0.98     | 0.03         | 17.09 | 0.60         | 0.67 | 0.05         |
| A86  | 1.32  | 0.05         | 13.39 | 0.38         | 0.98 | 0.03         | 1.17     | 0.05         | 16.00 | 0.44         | 0.70 | 0.04         | 1.06     | 0.03         | 18.81 | 0.54         | 0.64 | 0.05         |
| R87  | 1.36  | 0.06         | 23.69 | 1.82         | 0.53 | 0.04         | 0.98     | 0.04         | 16.98 | 0.95         | 1.02 | 0.08         | 0.98     | 0.05         | 21.51 | 1.83         | 1.04 | 0.10         |
| V88  | 1.20  | 0.05         | 17.21 | 1.08         | 0.90 | 0.04         | 1.22     | 0.06         | 14.53 | 0.41         | 0.77 | 0.04         | 0.91     | 0.04         | 21.59 | 1.21         | 0.91 | 0.09         |
| K89  | 1.41  | 0.10         | 16.71 | 1.22         | 0.59 | 0.07         | 1.86     | 0.16         | 22.53 | 3.12         | 0.66 | 0.08         | 1.13     | 0.08         | 18.31 | 2.77         | 1.51 | 0.35         |
| D91  | 1.46  | 0.04         | 15.76 | 0.46         | 0.88 | 0.03         | 1.36     | 0.03         | 17.80 | 0.31         | 0.79 | 0.02         | 1.09     | 0.02         | 19.38 | 0.43         | 0.76 | 0.03         |
| L92  | 1.35  | 0.07         | 18.40 | 1.12         | 0.65 | 0.03         | 1.36     | 0.06         | 21.15 | 0.70         | 0.62 | 0.04         | 1.07     | 0.03         | 28.23 | 1.71         | 0.82 | 0.06         |
| R93  | 1.31  | 0.06         | 28.56 | 1.97         | 1.05 | 0.09         | 1.5      | 0.11         | 31.69 | 2.61         | 0.64 | 0.07         | 1.12     | 0.08         | 8.56  | 0.58         | 0.78 | 0.10         |
| E94  | 1.36  | 0.06         | 15.43 | 1.02         | 0.81 | 0.04         | 1.42     | 0.09         | 17.37 | 0.65         | 0.92 | 0.04         | 1.17     | 0.05         | 19.22 | 0.75         | 0.96 | 0.06         |
| L96  | 1.35  | 0.06         | 15.27 | 1.03         | 0.83 | 0.07         | 1.39     | 0.08         | 30.20 | 1.37         | 0.76 | 0.05         | 1.40     | 0.06         | 10.40 | 0.16         | 0.61 | 0.05         |
| R97  | 1.36  | 0.06         | 25.14 | 1.66         | 0.83 | 0.07         | 1.22     | 0.05         | 9.33  | 0.24         | 1.03 | 0.05         | 1.19     | 0.07         | 14.75 | 1.19         | 0.97 | 0.07         |
| A98  | 1.38  | 0.06         | 18.16 | 1.21         | 0.74 | 0.06         | 1.33     | 0.09         | 6.25  | 0.14         | 1.05 | 0.07         | 1.13     | 0.07         | 15.62 | 0.97         | 0.95 | 0.10         |
| A99  | 1.25  | 0.05         | 15.11 | 0.72         | 0.75 | 0.03         | 1.31     | 0.07         | 17.91 | 0.52         | 0.84 | 0.04         | 1.03     | 0.04         | 21.66 | 0.80         | 1.00 | 0.06         |
| S100 | 1.45  | 0.04         | 13.29 | 0.32         | 0.93 | 0.03         | 1.35     | 0.04         | 15.76 | 0.53         | 0.80 | 0.02         | 1.05     | 0.02         | 18.78 | 0.61         | 0.66 | 0.03         |
| L101 | 1.30  | 0.06         | 25.81 | 1.85         | 0.78 | 0.04         | 1.31     | 0.09         | -     | -            | 0.66 | 0.06         | 1.13     | 0.07         | -     | -            | 1.06 | 0.10         |
| L102 | 1.30  | 0.06         | 20.50 | 1.51         | 0.67 | 0.06         | 1.13     | 0.06         | -     | -            | -    | -            | 1.01     | 0.06         | 11.45 | 1.62         | -    | -            |
| D103 | 1.47  | 0.05         | 21.04 | 0.82         | 0.85 | 0.09         | 1.21     | 0.04         | 11.84 | 0.31         | 0.70 | 0.03         | 1.05     | 0.03         | 23.08 | 1.27         | 0.89 | 0.04         |

| STAS |       |              |       |              |      |              | STAS+GTP |              |       |              |      |              | STAS+GDP |              |       |              |      |              |
|------|-------|--------------|-------|--------------|------|--------------|----------|--------------|-------|--------------|------|--------------|----------|--------------|-------|--------------|------|--------------|
| Res  | $R_1$ | $\delta R_1$ | $R_2$ | $\delta R_2$ | NOE  | $\delta$ NOE | $R_1$    | $\delta R_1$ | $R_2$ | $\delta R_2$ | NOE  | $\delta$ NOE | $R_1$    | $\delta R_1$ | $R_2$ | $\delta R_2$ | NOE  | $\delta$ NOE |
| K104 | 1.27  | 0.06         | 12.97 | 0.66         | 0.90 | 0.06         | 1.10     | 0.06         | 14.70 | 0.54         | 0.84 | 0.06         | 0.96     | 0.05         | 18.74 | 0.86         | 0.65 | 0.07         |
| I105 | 1.27  | 0.06         | 14.65 | 0.70         | 0.70 | 0.03         | 1.19     | 0.08         | 14.86 | 0.44         | 0.95 | 0.06         | 1.02     | 0.05         | 15.08 | 0.62         | 0.69 | 0.05         |
| G106 | 1.19  | 0.04         | 14.08 | 0.53         | -    | -            | 1.06     | 0.04         | 19.89 | 0.76         | 0.90 | 0.03         | 0.91     | 0.03         | 19.50 | 0.60         | 0.79 | 0.05         |
| E107 | 1.38  | 0.06         | 27.17 | 2.12         | 0.77 | 0.04         | 1.22     | 0.07         | 18.83 | 0.66         | 0.83 | 0.03         | 0.99     | 0.05         | 24.87 | 1.05         | 0.69 | 0.06         |
| D108 | 1.45  | 0.03         | 12.65 | 0.25         | 0.87 | 0.03         | 1.36     | 0.03         | 15.53 | 0.27         | 0.73 | 0.02         | 1.08     | 0.01         | 16.85 | 0.27         | 0.82 | 0.02         |
| H109 | 1.34  | 0.06         | 14.49 | 0.66         | 0.93 | 0.04         | 1.33     | 0.08         | 13.67 | 0.38         | 0.91 | 0.07         | 1.16     | 0.04         | 16.68 | 0.54         | 0.99 | 0.05         |
| I110 | 1.33  | 0.03         | 11.52 | 0.31         | 0.86 | 0.02         | 1.26     | 0.05         | 13.61 | 0.48         | 0.86 | 0.03         | 1.00     | 0.02         | 17.83 | 0.95         | 0.66 | 0.03         |
| F111 | 1.34  | 0.05         | 12.48 | 0.52         | 0.88 | 0.03         | 1.22     | 0.07         | 14.50 | 0.53         | 1.13 | 0.05         | 1.00     | 0.04         | 17.50 | 0.61         | 0.98 | 0.06         |
| T113 | 1.30  | 0.03         | 12.79 | 0.33         | 0.78 | 0.02         | 1.30     | 0.04         | 17.60 | 0.54         | 0.86 | 0.03         | 0.96     | 0.02         | 17.12 | 0.79         | 0.96 | 0.04         |
| L114 | 1.50  | 0.08         | 18.80 | 1.51         | 0.88 | 0.08         | 1.38     | 0.10         | 12.66 | 0.37         | 0.75 | 0.04         | 1.18     | 0.06         | 19.72 | 0.77         | 0.92 | 0.07         |
| T116 | 1.39  | 0.04         | 13.72 | 0.44         | 0.91 | 0.03         | 1.25     | 0.04         | 16.56 | 0.77         | 0.92 | 0.03         | 1.00     | 0.02         | 19.19 | 0.75         | 0.89 | 0.04         |
| A117 | 1.41  | 0.03         | 13.38 | 0.36         | 0.78 | 0.02         | 1.46     | 0.05         | 16.24 | 0.90         | 0.84 | 0.03         | 1.07     | 0.03         | 20.35 | 0.86         | 0.93 | 0.04         |
| V118 | 1.36  | 0.05         | 12.67 | 0.54         | 0.78 | 0.03         | 1.22     | 0.06         | 16.49 | 0.44         | 0.76 | 0.03         | 1.01     | 0.03         | 18.66 | 0.56         | 0.99 | 0.05         |
| Q119 | 1.23  | 0.05         | 24.22 | 1.91         | 0.62 | 0.03         | -        | -            | 20.81 | 1.00         | -    | -            | 1.01     | 0.02         | 20.17 | 0.91         | -    | -            |
| A120 | 1.34  | 0.03         | 13.57 | 0.30         | 0.85 | 0.02         | 1.29     | 0.04         | 16.30 | 0.63         | 0.84 | 0.03         | 1.03     | 0.02         | 18.58 | 0.85         | 1.08 | 0.04         |
| F121 | 1.34  | 0.04         | 13.79 | 0.44         | 0.78 | 0.03         | 1.23     | 0.05         | 17.78 | 1.04         | -    | -            | -        | -            | 21.64 | 1.18         | 0.70 | 0.07         |
| R122 | 1.37  | 0.04         | 14.54 | 0.41         | 0.85 | 0.02         | 1.32     | 0.05         | 13.88 | 0.55         | 1.04 | 0.04         | 1.07     | 0.02         | 20.76 | 1.17         | 0.72 | 0.03         |
| R123 | 1.31  | 0.04         | 11.10 | 0.33         | 0.72 | 0.02         | 1.22     | 0.05         | 13.92 | 0.52         | 0.89 | 0.03         | 1.00     | 0.02         | 16.88 | 0.68         | 0.73 | 0.04         |
| R124 | 1.42  | 0.04         | 12.34 | 0.32         | 0.86 | 0.02         | 1.32     | 0.05         | 16.25 | 0.47         | 0.77 | 0.03         | 1.05     | 0.02         | 19.04 | 0.75         | 0.83 | 0.03         |

Table S2: Inertia and diffusion tensors of Rv1739c STAS.

| Inertia Tensor                             |                 |                  |       |
|--------------------------------------------|-----------------|------------------|-------|
|                                            | $I_x$           | $I_y$            | $I_z$ |
| <i>relative moments</i>                    | 1.000           | 0.91             | 0.77  |
| Diffusion Tensor : axially symmetric model |                 |                  |       |
|                                            | <i>Actual</i>   | <i>Jackknife</i> |       |
| $D_{iso}$                                  | $1.74 \pm 0.01$ | $1.74 \pm 0.01$  |       |
| $D_{  }/D_{\perp}$                         | $0.83 \pm 0.02$ | $0.84 \pm 0.07$  |       |
| $\theta$                                   | $0.71 \pm 0.05$ | $0.64 \pm 0.25$  |       |
| $\varphi$                                  | $5.63 \pm 0.06$ | $5.65 \pm 0.20$  |       |



Table S3: Fast model-free  $^{15}\text{N}$  backbone relaxation motional parameters of Rv1739c STAS at 600.13 MHz and 300 K. Residue-specific parameters of fitted model,  $S^2$ ,  $\tau_e$ , and  $R_{\text{ex}}$ ,  $S^2_{\text{f}}$ , and  $S^2_{\text{s}}$  represent faster and slower  $S^2$ , respectively, that have accounted for residue-fit by the indicated model. Errors in parameter estimation are shown as  $\delta$ parameter.

| Res | Model | $S^2$ | $\delta S^2$ | $S^2_{\text{f}}$ | $\delta S^2_{\text{f}}$ | $S^2_{\text{s}}$ | $\delta S^2_{\text{s}}$ | $\tau_e$ (ps) | $\delta\tau_e$ (ps) | $R_{\text{ex}}$ ( $\text{s}^{-1}$ ) | $\delta R_{\text{ex}}$ ( $\text{s}^{-1}$ ) |
|-----|-------|-------|--------------|------------------|-------------------------|------------------|-------------------------|---------------|---------------------|-------------------------------------|--------------------------------------------|
| I4  | 4     | 0.15  | 0.01         | -                | -                       | 0.15             | 0.01                    | 820.28        | 39.61               | 0.60                                | 0.04                                       |
| D5  | 5     | 0.20  | 0.01         | 0.85             | 0.01                    | 0.24             | 0.01                    | 1085.80       | 17.44               | -                                   | -                                          |
| D6  | 5     | 0.26  | 0.01         | 0.78             | 0.01                    | 0.33             | 0.01                    | 1296.20       | 41.66               | -                                   | -                                          |
| Y7  | 5     | 0.32  | 0.01         | 0.79             | 0.02                    | 0.41             | 0.01                    | 1437.2        | 90.05               | -                                   | -                                          |
| Q9  | -     | -     | -            | -                | -                       | -                | -                       | -             | -                   | -                                   | -                                          |
| A10 | 5     | 0.38  | 0.03         | 0.73             | 0.03                    | 0.53             | 0.04                    | 2267.9        | 287.18              | -                                   | -                                          |
| K11 | 1     | 0.93  | 0.02         | -                | -                       | 0.93             | 0.02                    | -             | -                   | -                                   | -                                          |
| R12 | 5     | 0.57  | 0.04         | 0.83             | 0.03                    | 0.69             | 0.04                    | 1879.0        | 1270.0              | -                                   | -                                          |
| V13 | 4     | 0.86  | 0.04         | -                | -                       | 0.86             | 0.04                    | 135.75        | 140.12              | 2.40                                | 0.84                                       |
| G15 | 2     | 0.86  | 0.02         | -                | -                       | 0.86             | 0.02                    | 77.47         | 29.51               | -                                   | -                                          |
| L16 | 1     | 0.97  | 0.02         | -                | -                       | 0.97             | 0.02                    | -             | -                   | -                                   | -                                          |
| V17 | 1     | 0.92  | 0.03         | -                | -                       | 0.92             | 0.03                    | -             | -                   | -                                   | -                                          |
| V18 | 1     | 0.91  | 0.03         | -                | -                       | 0.91             | 0.03                    | -             | -                   | -                                   | -                                          |
| Y19 | -     | -     | -            | -                | -                       | -                | -                       | -             | -                   | -                                   | -                                          |
| D22 | 4     | 0.89  | 0.03         | -                | -                       | 0.89             | 0.03                    | 143.54        | 195.12              | 2.56                                | 1.06                                       |
| A23 | 2     | 0.78  | 0.01         | -                | -                       | 0.78             | 0.01                    | 31.67         | 5.87                | -                                   | -                                          |
| L25 | 1     | 1.00  | 0.02         | -                | -                       | 1.00             | 0.02                    | -             | -                   | -                                   | -                                          |
| A28 | 1     | 0.92  | 0.03         | -                | -                       | 0.92             | 0.03                    | -             | -                   | -                                   | -                                          |
| N29 | 1     | 1.00  | 0.02         | -                | -                       | 1.00             | 0.02                    | -             | -                   | -                                   | -                                          |
| A30 | 1     | 0.94  | 0.04         | -                | -                       | 0.94             | 0.04                    | -             | -                   | -                                   | -                                          |
| E31 | 1     | 0.98  | 0.01         | -                | -                       | 0.97             | 0.02                    | -             | -                   | -                                   | -                                          |
| D32 | 1     | 0.92  | 0.02         | -                | -                       | 0.92             | 0.02                    | -             | -                   | -                                   | -                                          |
| F33 | 1     | 0.92  | 0.02         | -                | -                       | 0.92             | 0.02                    | -             | -                   | -                                   | -                                          |
| R34 | 1     | 0.84  | 0.02         | -                | -                       | 0.84             | 0.02                    | -             | -                   | -                                   | -                                          |
| R35 | -     | -     | -            | -                | -                       | -                | -                       | -             | -                   | -                                   | -                                          |
| R36 | 1     | 0.96  | 0.02         | -                | -                       | 0.96             | 0.02                    | -             | -                   | -                                   | -                                          |
| A37 | 3     | 0.89  | 0.03         | -                | -                       | 0.89             | 0.03                    | -             | -                   | 2.64                                | 0.80                                       |
| L38 | 2     | 0.85  | 0.02         | -                | -                       | 0.85             | 0.02                    | 58.90         | 18.12               | -                                   | -                                          |
| T39 | 1     | 0.89  | 0.01         | -                | -                       | 0.89             | 0.01                    | -             | -                   | -                                   | -                                          |
| V40 | 1     | 0.94  | 0.02         | -                | -                       | 0.94             | 0.02                    | -             | -                   | -                                   | -                                          |
| V41 | 4     | 0.82  | 0.03         | -                | -                       | 0.82             | 0.03                    | 40.46         | 9.72                | 1.86                                | 0.57                                       |
| D42 | 1     | 0.90  | 0.01         | -                | -                       | 0.90             | 0.01                    | -             | -                   | -                                   | -                                          |
| Q43 | 2     | 0.85  | 0.01         | -                | -                       | 0.85             | 0.01                    | 54.72         | 8.66                | -                                   | -                                          |
| D44 | 4     | 0.84  | 0.01         | -                | -                       | 0.84             | 0.01                    | 45.18         | 7.02                | 1.60                                | 0.35                                       |
| G46 | -     | -     | -            | -                | -                       | -                | -                       | -             | -                   | -                                   | -                                          |
| V48 | 1     | 0.84  | 0.02         | -                | -                       | 0.84             | 0.02                    | -             | -                   | -                                   | -                                          |
| E49 | 1     | 0.90  | 0.03         | -                | -                       | 0.90             | 0.03                    | -             | -                   | -                                   | -                                          |
| W50 | -     | -     | -            | -                | -                       | -                | -                       | -             | -                   | -                                   | -                                          |
| F51 | -     | -     | -            | -                | -                       | -                | -                       | -             | -                   | -                                   | -                                          |
| V52 | 1     | 0.89  | 0.03         | -                | -                       | 0.89             | 0.03                    | -             | -                   | -                                   | -                                          |
| L53 | 1     | 0.94  | 0.03         | -                | -                       | 0.94             | 0.03                    | -             | -                   | -                                   | -                                          |
| N54 | 2     | 0.94  | 0.02         | -                | -                       | 0.94             | 0.03                    | 76.22         | 230.84              | -                                   | -                                          |
| A55 | 2     | 0.89  | 0.02         | -                | -                       | 0.90             | 0.03                    | 78.95         | 97.0                | -                                   | -                                          |
| E56 | 3     | 0.93  | 0.02         | -                | -                       | 0.93             | 0.02                    | -             | -                   | 1.51                                | 0.55                                       |
| S57 | 4     | 0.80  | 0.04         | -                | -                       | 0.80             | 0.04                    | 41.28         | 13.55               | 12.97                               | 1.77                                       |
| V59 | 1     | 1.00  | 0.02         | -                | -                       | 1.00             | 0.03                    | -             | -                   | -                                   | -                                          |
| E60 | 5     | 0.46  | 0.03         | 0.82             | 0.03                    | 0.56             | 0.03                    | 1435.1        | 116.94              | -                                   | -                                          |

| Res  | Model | $S^2$ | $\delta S^2$ | $S^2_f$ | $\delta S^2_f$ | $S^2_s$ | $\delta S^2_s$ | $\tau_e$ (ps) | $\delta\tau_e$ (ps) | $R_{ex}$ (s <sup>-1</sup> ) | $\delta R_{ex}$ (s <sup>-1</sup> ) |
|------|-------|-------|--------------|---------|----------------|---------|----------------|---------------|---------------------|-----------------------------|------------------------------------|
| V61  | 2     | 0.93  | 0.03         | -       | -              | 0.93    | 0.03           | 248.50        | 336.40              | -                           | -                                  |
| D62  | 2     | 0.91  | 0.03         | -       | -              | 0.91    | 0.03           | 590.09        | 341.81              | -                           | -                                  |
| T64  | 3     | 0.83  | 0.03         | -       | -              | 0.83    | 0.03           | -             | -                   | 13.83                       | 2.17                               |
| A65  | 1     | 1.00  | 0.02         | -       | -              | 1.00    | 0.02           | -             | -                   | -                           | -                                  |
| L66  | 3     | 0.89  | 0.04         | -       | -              | 0.89    | 0.04           | -             | -                   | 2.75                        | 1.02                               |
| D67  | 5     | 0.73  | 0.02         | 0.84    | 0.01           | 0.87    | 0.02           | 2015.9        | 717.34              | -                           | -                                  |
| A68  | 1     | 0.94  | 0.02         | -       | -              | 0.94    | 0.02           | -             | -                   | -                           | -                                  |
| L69  | 1     | 0.92  | 0.02         | -       | -              | 0.92    | 0.02           | -             | -                   | -                           | -                                  |
| D70  | 2     | 0.88  | 0.02         | -       | -              | 0.88    | 0.02           | 43.94         | 27.37               | -                           | -                                  |
| Q71  | 1     | 0.93  | 0.02         | -       | -              | 0.93    | 0.02           | -             | -                   | -                           | -                                  |
| L72  | 1     | 0.95  | 0.03         | -       | -              | 0.95    | 0.03           | -             | -                   | -                           | -                                  |
| R73  | 1     | 0.97  | 0.02         | -       | -              | 0.97    | 0.02           | -             | -                   | -                           | -                                  |
| T74  | 1     | 0.97  | 0.02         | -       | -              | 0.97    | 0.02           | -             | -                   | -                           | -                                  |
| L76  | 1     | 1.00  | 0.01         | -       | -              | 1.00    | 0.01           | -             | -                   | -                           | -                                  |
| L77  | 1     | 0.91  | 0.02         | -       | -              | 0.91    | 0.02           | -             | -                   | -                           | -                                  |
| R78  | -     | -     | -            | -       | -              | -       | -              | -             | -                   | -                           | -                                  |
| R79  | 1     | 0.93  | 0.02         | -       | -              | 0.93    | 0.02           | -             | -                   | -                           | -                                  |
| G80  | -     | -     | -            | -       | -              | -       | -              | -             | -                   | -                           | -                                  |
| I81  | 1     | 0.88  | 0.02         | -       | -              | 0.88    | 0.02           | -             | -                   | -                           | -                                  |
| V82  | 1     | 0.86  | 0.03         | -       | -              | 0.86    | 0.03           | -             | -                   | -                           | -                                  |
| F83  | 1     | 0.88  | 0.02         | -       | -              | 0.88    | 0.02           | -             | -                   | -                           | -                                  |
| A84  | 1     | 0.91  | 0.02         | -       | -              | 0.91    | 0.02           | -             | -                   | -                           | -                                  |
| M85  | 1     | 0.86  | 0.02         | -       | -              | 0.86    | 0.02           | -             | -                   | -                           | -                                  |
| A86  | -     | -     | -            | -       | -              | -       | -              | -             | -                   | -                           | -                                  |
| V88  | 3     | 0.83  | 0.04         | -       | -              | 0.83    | 0.04           | -             | -                   | 5.23                        | 1.15                               |
| K89  | 1     | 1.00  | 0.03         | -       | -              | 1.00    | 0.03           | -             | -                   | -                           | -                                  |
| D91  | 1     | 1.00  | 0.01         | -       | -              | 1.00    | 0.01           | -             | -                   | -                           | -                                  |
| L92  | 4     | 0.91  | 0.03         | -       | -              | 0.91    | 0.03           | 135.11        | 265.61              | 4.80                        | 1.25                               |
| E94  | 1     | 0.98  | 0.03         | -       | -              | 0.98    | 0.03           | -             | -                   | -                           | -                                  |
| L96  | 1     | 0.97  | 0.03         | -       | -              | 0.97    | 0.03           | -             | -                   | -                           | -                                  |
| A98  | 1     | 1.00  | 0.02         | -       | -              | 1.00    | 0.02           | -             | -                   | -                           | -                                  |
| A99  | 1     | 0.93  | 0.03         | -       | -              | 0.93    | 0.03           | -             | -                   | -                           | -                                  |
| S100 | -     | -     | -            | -       | -              | -       | -              | -             | -                   | -                           | -                                  |
| K104 | 1     | 0.89  | 0.03         | -       | -              | 0.89    | 0.03           | -             | -                   | -                           | -                                  |
| I105 | 4     | 0.86  | 0.04         | -       | -              | 0.86    | 0.04           | 49.37         | 37.99               | 2.03                        | 0.85                               |
| G106 | 1     | 0.88  | 0.02         | -       | -              | 0.88    | 0.02           | -             | -                   | -                           | -                                  |
| D108 | 1     | 0.94  | 0.01         | -       | -              | 0.94    | 0.01           | -             | -                   | -                           | -                                  |
| H109 | 1     | 0.96  | 0.03         | -       | -              | 0.96    | 0.03           | -             | -                   | -                           | -                                  |
| I110 | 1     | 0.86  | 0.02         | -       | -              | 0.86    | 0.02           | -             | -                   | -                           | -                                  |
| F111 | 1     | 0.89  | 0.03         | -       | -              | 0.89    | 0.03           | -             | -                   | -                           | -                                  |
| T113 | 1     | 0.89  | 0.02         | -       | -              | 0.89    | 0.02           | -             | -                   | -                           | -                                  |
| L114 | 1     | 1.00  | 0.03         | -       | -              | 1.00    | 0.03           | -             | -                   | -                           | -                                  |
| T116 | 1     | 0.96  | 0.02         | -       | -              | 0.96    | 0.02           | -             | -                   | -                           | -                                  |
| A117 | 1     | 0.95  | 0.02         | -       | -              | 0.95    | 0.02           | -             | -                   | -                           | -                                  |
| V118 | 1     | 0.91  | 0.03         | -       | -              | 0.91    | 0.03           | -             | -                   | -                           | -                                  |
| A120 | 1     | 0.93  | 0.01         | -       | -              | 0.94    | 0.02           | -             | -                   | -                           | -                                  |
| F121 | 1     | 0.94  | 0.02         | -       | -              | 0.94    | 0.02           | -             | -                   | -                           | -                                  |
| R122 | 1     | 0.97  | 0.02         | -       | -              | 0.97    | 0.02           | -             | -                   | -                           | -                                  |
| R123 | 5     | 0.77  | 0.03         | 0.85    | 0.02           | 0.91    | 0.02           | 1170.7        | 331.27              | -                           | -                                  |
| R124 | -     | -     | -            | -       | -              | -       | -              | -             | -                   | -                           | -                                  |

Figure S3: Rv1739c STAS residues showing chemical shift perturbation (CSP) upon binding of GTP (A) or GDP (B) are mapped onto the average STAS structure. Red residues show increased  $R_2$  and  $J(0)$  and decreased NOE and  $J(\omega_N)$  values; yellow residues deviated from the red pattern in one or two relaxation parameters; blue residues are those lacking at least two relaxation parameters due to experimental limitations.

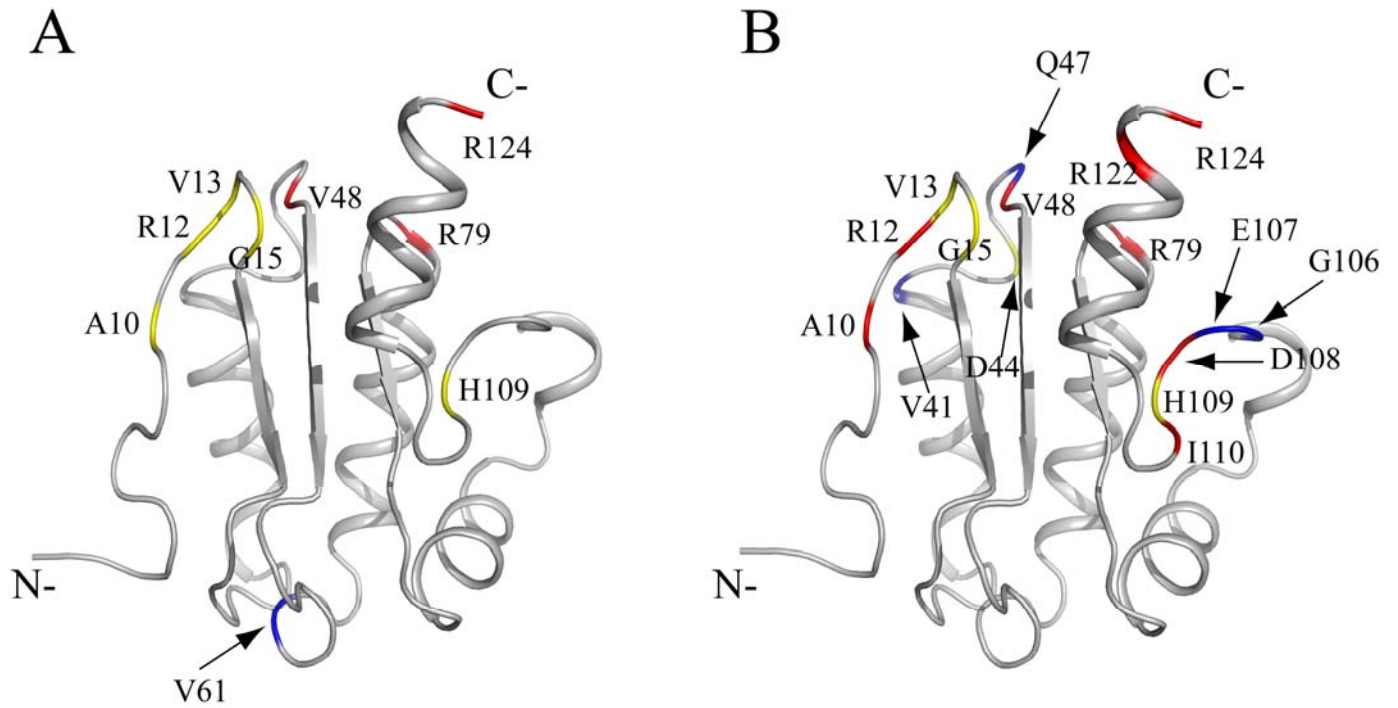

Figure S4: Reduced spectral density correlation scatter plots of Rv1739c STAS. Values of  $J(\omega_N)$  plotted as a function of  $J(0)$  for residues of (A) STAS; (B) STAS +GTP; (C) STAS+GDP; Values of  $J(0.87\omega_H)$  plotted as a function of  $J(0)$  for residues of (D) STAS; (E) STAS+GTP; (F) STAS+GDP. (D-F), blue residues with  $J(0) < 2/5\tau_m$  and  $J(0.87\omega_H) > 7.5$  ps/rad; cyan residues with  $J(0) < 2/5\tau_m$  and  $J(0.87\omega_H) < 7.5$  ps/rad; red residues with  $J(0) > J(0)_{\text{cutoff}}$  are labeled with residue number. Open circles in A-C and blue or cyan residues in D-F comprised the majority of N-terminal loop L1 residues, and fit to a different linear correlation than did most core region residues. This color scheme is shared with that of Fig. 7.  $J(0)_{\text{cutoff}} = J(0) + \text{one RMSD}$ .

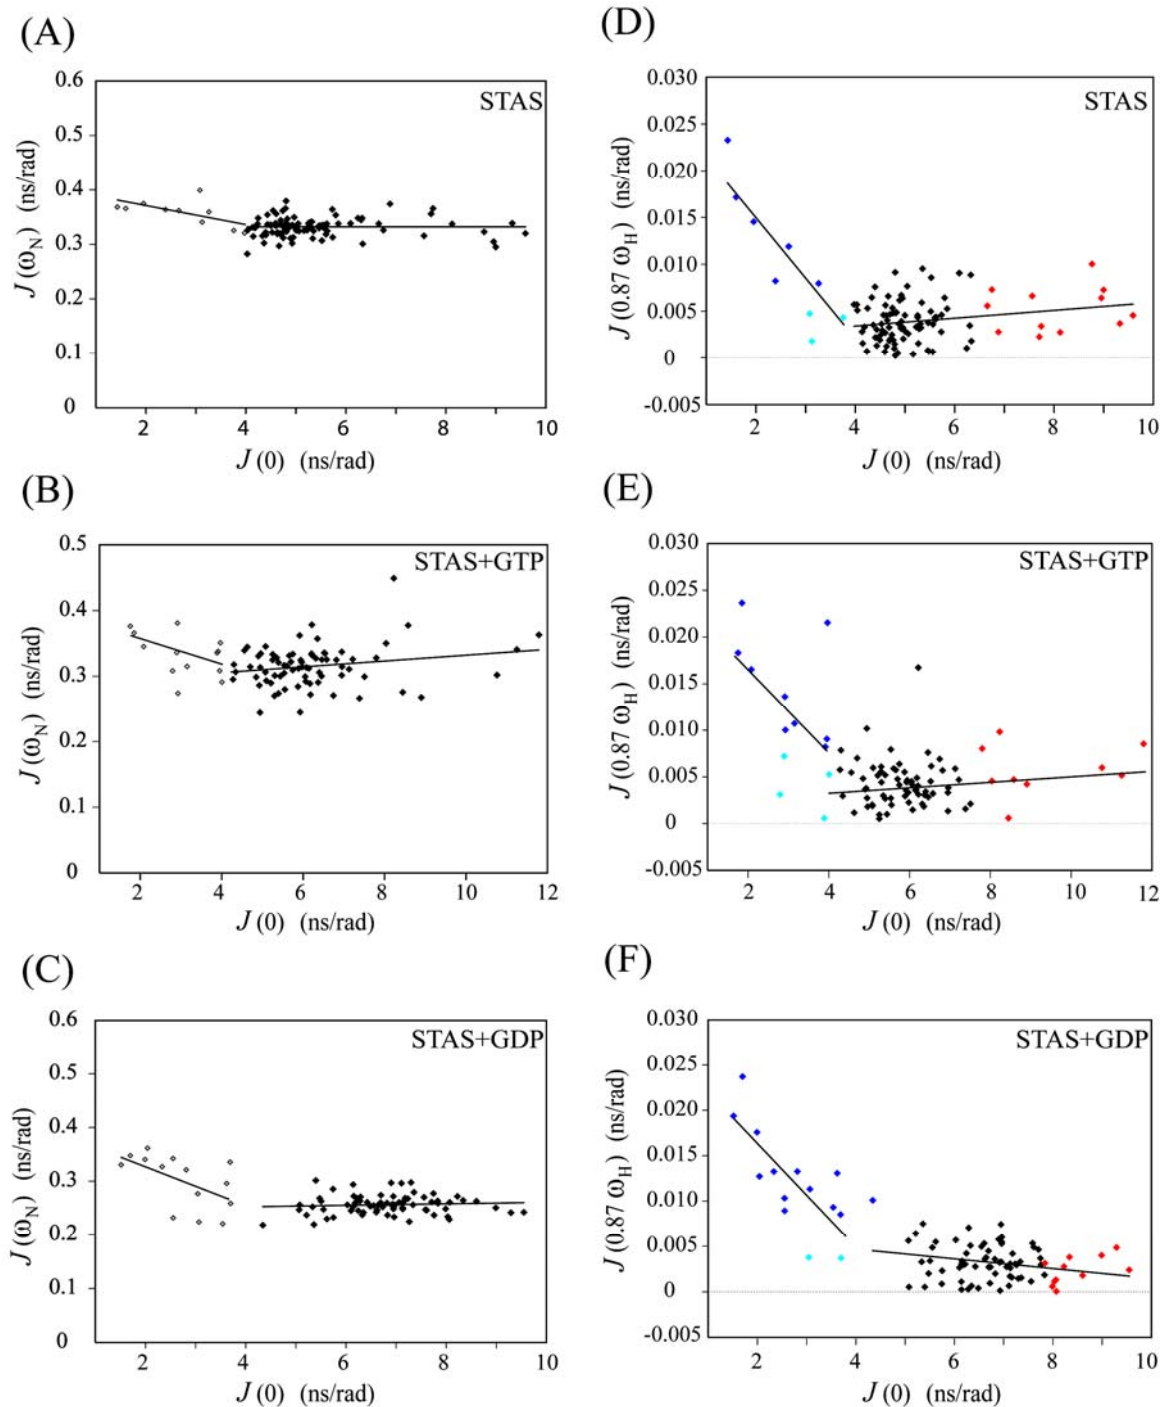

Table S4:  $^{15}\text{N}$  backbone reduced spectral density function parameters derived from measured  $^{15}\text{N}$  relaxation data at 600.13 MHz and 300K. Residue-specific reduced spectral density parameters,  $J(0)$  (ns/rad),  $J(\omega_{\text{N}})$  (ns/rad), and  $J(0.87\omega_{\text{H}})$  (ps/rad) of Rv1739c STAS in free-state and in complex with saturated concentrations of GTP and GDP are shown. Errors in parameter estimation are shown as  $\delta J$ .

| Res | STAS   |               |                        |                               |                            |                                   | STAS+GTP |               |                        |                               |                            |                                   | STAS+GDP |               |                        |                               |                            |                                   |
|-----|--------|---------------|------------------------|-------------------------------|----------------------------|-----------------------------------|----------|---------------|------------------------|-------------------------------|----------------------------|-----------------------------------|----------|---------------|------------------------|-------------------------------|----------------------------|-----------------------------------|
|     | $J(0)$ | $\delta J(0)$ | $J(\omega_{\text{N}})$ | $\delta J(\omega_{\text{N}})$ | $J(0.87\omega_{\text{H}})$ | $\delta J(0.87\omega_{\text{H}})$ | $J(0)$   | $\delta J(0)$ | $J(\omega_{\text{N}})$ | $\delta J(\omega_{\text{N}})$ | $J(0.87\omega_{\text{H}})$ | $\delta J(0.87\omega_{\text{H}})$ | $J(0)$   | $\delta J(0)$ | $J(\omega_{\text{N}})$ | $\delta J(\omega_{\text{N}})$ | $J(0.87\omega_{\text{H}})$ | $\delta J(0.87\omega_{\text{H}})$ |
| D3  | -      | -             | -                      | -                             | -                          | -                                 | -        | -             | -                      | -                             | -                          | -                                 | 2.55     | 0.07          | 0.34                   | 0.02                          | 10.32                      | 2.21                              |
| I4  | -      | -             | -                      | -                             | -                          | -                                 | -        | -             | -                      | -                             | -                          | -                                 | 1.51     | 0.01          | 0.33                   | 0.01                          | 19.38                      | 0.35                              |
| D5  | 1.43   | 0.02          | 0.37                   | 0.01                          | 23.28                      | 0.40                              | 1.85     | 0.01          | 0.37                   | 0.01                          | 23.65                      | 0.41                              | 1.70     | 0.01          | 0.35                   | 0.01                          | 23.72                      | 0.67                              |
| D6  | 1.60   | 0.03          | 0.37                   | 0.01                          | 17.16                      | 0.59                              | 1.76     | 0             | 0.38                   | 0.01                          | 18.32                      | 0.43                              | 2.04     | 0.01          | 0.36                   | 0.01                          | 12.73                      | 0.62                              |
| Y7  | 1.95   | 0.04          | 0.37                   | 0.01                          | 14.54                      | 0.86                              | 2.08     | 0.01          | 0.35                   | 0.01                          | 16.53                      | 0.50                              | 2.33     | 0.02          | 0.33                   | 0.01                          | 13.26                      | 0.53                              |
| Q9  | 3.08   | 0.07          | 0.4                    | 0.01                          | 4.73                       | 0.63                              | 2.79     | 0.03          | 0.31                   | 0.01                          | 3.12                       | 0.73                              | 3.07     | 0.03          | 0.22                   | 0.01                          | 11.32                      | 0.31                              |
| A10 | 2.39   | 0.15          | 0.36                   | 0.02                          | 8.21                       | 0.70                              | 2.91     | 0.01          | 0.38                   | 0.01                          | 13.62                      | 0.56                              | 2.81     | 0.02          | 0.32                   | 0.01                          | 13.26                      | 0.54                              |
| K11 | 4.70   | 0.12          | 0.34                   | 0.01                          | 4.66                       | 0.44                              | 4.85     | 0.04          | 0.30                   | 0.01                          | 4.82                       | 0.45                              | 6.91     | 0.17          | 0.26                   | 0.01                          | 3.21                       | 0.47                              |
| R12 | 3.26   | 0.11          | 0.36                   | 0.01                          | 7.96                       | 1.55                              | 3.15     | 0.02          | 0.32                   | 0.01                          | 10.73                      | 0.55                              | 3.62     | 0.05          | 0.30                   | 0.01                          | 13.07                      | 0.64                              |
| V13 | 5.35   | 0.28          | 0.32                   | 0.02                          | 9.53                       | 1.25                              | 3.95     | 0.10          | 0.31                   | 0.01                          | 9.05                       | 0.77                              | 6.70     | 0.23          | 0.27                   | 0.01                          | 2.70                       | 1.17                              |
| G15 | 4.40   | 0.13          | 0.32                   | 0.01                          | 7.58                       | 0.60                              | 5.10     | 0.08          | 0.29                   | 0.01                          | 5.96                       | 0.53                              | 6.10     | 0.14          | 0.25                   | 0.01                          | 2.64                       | 0.6                               |
| L16 | 5.25   | 0.23          | 0.34                   | 0.01                          | 4.55                       | 0.62                              | 6.21     | 0.11          | 0.33                   | 0.01                          | 4.04                       | 0.84                              | 5.51     | 0.16          | 0.26                   | 0.01                          | 3.38                       | 0.7                               |
| V17 | 4.80   | 0.26          | 0.34                   | 0.02                          | 0.24                       | 1.08                              | 5.89     | 0.17          | 0.31                   | 0.01                          | 2.95                       | 0.90                              | 6.82     | 0.29          | 0.26                   | 0.01                          | 3.58                       | 0.89                              |
| V18 | 4.76   | 0.23          | 0.32                   | 0.01                          | 4.79                       | 0.63                              | 3.89     | 0.12          | 0.34                   | 0.01                          | 0.57                       | 1.13                              | 5.07     | 0.19          | 0.25                   | 0.01                          | 5.61                       | 0.73                              |
| Y19 | 4.23   | 0.17          | 0.34                   | 0.01                          | 0.69                       | 0.65                              | -        | -             | -                      | -                             | -                          | -                                 | 6.64     | 0.23          | 0.26                   | 0.01                          | 3.76                       | 0.75                              |
| R20 | 3.13   | 0.16          | 0.34                   | 0.01                          | 1.78                       | 0.84                              | 5.08     | 0.07          | 0.35                   | 0.01                          | 1.9                        | 0.78                              | 6.55     | 0.20          | 0.25                   | 0.01                          | 4.97                       | 0.72                              |
| Y21 | 7.71   | 0.54          | 0.36                   | 0.02                          | 2.26                       | 1.26                              | 10.76    | 0.83          | 0.30                   | 0.02                          | 5.98                       | 1.18                              | 9.55     | 1.18          | 0.24                   | 0.01                          | 2.39                       | 1.45                              |
| D22 | 5.53   | 0.38          | 0.33                   | 0.02                          | 8.58                       | 0.61                              | 8.04     | 0.39          | 0.35                   | 0.01                          | 4.56                       | 1.02                              | 7.36     | 0.42          | 0.28                   | 0.02                          | 1.54                       | 1.14                              |
| A23 | 4.03   | 0.11          | 0.28                   | 0.01                          | 5.70                       | 0.49                              | 4.94     | 0.06          | 0.24                   | 0.01                          | 10.17                      | 0.43                              | 5.36     | 0.11          | 0.22                   | 0.01                          | 7.49                       | 0.51                              |
| L25 | 5.85   | 0.31          | 0.34                   | 0.02                          | 5.26                       | 0.68                              | -        | -             | -                      | -                             | -                          | -                                 | 8.34     | 0.93          | 0.26                   | 0.01                          | 3.80                       | 1.04                              |
| C28 | 4.25   | 0.29          | 0.35                   | 0.02                          | 5.31                       | 1.12                              | -        | -             | -                      | -                             | -                          | -                                 | -        | -             | -                      | -                             | -                          | -                                 |
| N29 | 6.30   | 0.44          | 0.34                   | 0.02                          | 3.46                       | 0.78                              | 8.90     | 0.24          | 0.27                   | 0.01                          | 4.22                       | 0.76                              | 8.22     | 0.49          | 0.27                   | 0.02                          | 2.75                       | 1.09                              |
| A30 | 5.48   | 0.40          | 0.33                   | 0.02                          | 0.70                       | 1.42                              | 8.45     | 0.67          | 0.28                   | 0.02                          | 0.6                        | 1.43                              | -        | -             | -                      | -                             | -                          | -                                 |
| E31 | 5.32   | 0.14          | 0.34                   | 0.01                          | 3.23                       | 0.50                              | 6.37     | 0.06          | 0.29                   | 0.01                          | 3.06                       | 0.45                              | 7.76     | 0.35          | 0.24                   | 0.01                          | 2.95                       | 0.49                              |
| D32 | 4.81   | 0.13          | 0.32                   | 0.01                          | 4.82                       | 0.73                              | 5.55     | 0.06          | 0.28                   | 0.01                          | 2.01                       | 0.46                              | 6.73     | 0.37          | 0.25                   | 0.01                          | 2.70                       | 0.57                              |
| F33 | 5.01   | 0.21          | 0.33                   | 0.01                          | 2.83                       | 0.52                              | 7.51     | 0.14          | 0.30                   | 0.01                          | 2.12                       | 0.77                              | 7.34     | 0.32          | 0.26                   | 0.01                          | 3.29                       | 0.66                              |
| R34 | 4.15   | 0.13          | 0.31                   | 0.01                          | 1.56                       | 0.45                              | 2.93     | 0.04          | 0.27                   | 0.01                          | 10.03                      | 0.45                              | 2.55     | 0.03          | 0.23                   | 0.01                          | 8.92                       | 0.41                              |
| R35 | 5.56   | 0.19          | 0.33                   | 0.01                          | 0.64                       | 0.56                              | 7.22     | 0.10          | 0.33                   | 0.01                          | 4.68                       | 0.53                              | 7.83     | 0.40          | 0.26                   | 0.01                          | 1.84                       | 0.73                              |
| R36 | 5.26   | 0.17          | 0.33                   | 0.01                          | 4.34                       | 0.56                              | 5.75     | 0.07          | 0.31                   | 0.01                          | 6.38                       | 0.58                              | 7.61     | 0.36          | 0.25                   | 0.01                          | 4.89                       | 0.56                              |

| Res | STAS   |               |               |                      |                   |                          | STAS+GTP |               |               |                      |                   |                          | STAS+GDP |               |               |                      |                   |                          |
|-----|--------|---------------|---------------|----------------------|-------------------|--------------------------|----------|---------------|---------------|----------------------|-------------------|--------------------------|----------|---------------|---------------|----------------------|-------------------|--------------------------|
|     | $J(0)$ | $\delta J(0)$ | $J(\omega_N)$ | $\delta J(\omega_N)$ | $J(0.87\omega_H)$ | $\delta J(0.87\omega_H)$ | $J(0)$   | $\delta J(0)$ | $J(\omega_N)$ | $\delta J(\omega_N)$ | $J(0.87\omega_H)$ | $\delta J(0.87\omega_H)$ | $J(0)$   | $\delta J(0)$ | $J(\omega_N)$ | $\delta J(\omega_N)$ | $J(0.87\omega_H)$ | $\delta J(0.87\omega_H)$ |
| A37 | 5.60   | 0.24          | 0.32          | 0.01                 | 4.32              | 0.68                     | 6.75     | 0.17          | 0.27          | 0.01                 | 6.90              | 0.57                     | 3.54     | 0.07          | 0.22          | 0.01                 | 9.31              | 0.43                     |
| L38 | 4.66   | 0.21          | 0.30          | 0.01                 | 6.59              | 0.56                     | 5.93     | 0.20          | 0.24          | 0.01                 | 4.42              | 0.84                     | 6.62     | 0.30          | 0.25          | 0.01                 | 3.59              | 0.95                     |
| T39 | 4.68   | 0.11          | 0.32          | 0.01                 | 3.28              | 0.38                     | 6.06     | 0.07          | 0.29          | 0.01                 | 4.16              | 0.42                     | 6.83     | 0.29          | 0.24          | 0.01                 | 1.98              | 0.46                     |
| V40 | 4.93   | 0.15          | 0.33          | 0.01                 | 3.91              | 0.52                     | 6.14     | 0.09          | 0.31          | 0.01                 | 3.58              | 0.71                     | 7.59     | 0.43          | 0.25          | 0.01                 | 5.33              | 0.54                     |
| V41 | 4.93   | 0.18          | 0.30          | 0.01                 | 6.70              | 0.47                     | 6.18     | 0.11          | 0.27          | 0.01                 | 4.88              | 0.54                     | -        | -             | -             | -                    | -                 | -                        |
| D42 | 4.64   | 0.12          | 0.32          | 0.01                 | 4.04              | 0.39                     | 6.40     | 0.06          | 0.31          | 0.01                 | 3.42              | 0.49                     | 6.95     | 0.35          | 0.25          | 0.01                 | 3.28              | 0.55                     |
| Q43 | 4.33   | 0.09          | 0.32          | 0.01                 | 6.46              | 0.38                     | 5.21     | 0.04          | 0.29          | 0.01                 | 5.15              | 0.44                     | 6.14     | 0.23          | 0.25          | 0.01                 | 1.10              | 0.46                     |
| D44 | 4.89   | 0.11          | 0.31          | 0.01                 | 6.15              | 0.37                     | 5.54     | 0.04          | 0.30          | 0.01                 | 7.93              | 0.42                     | 6.15     | 0.20          | 0.25          | 0.01                 | 3.05              | 0.45                     |
| G46 | 3.76   | 0.06          | 0.33          | 0.01                 | 4.32              | 0.45                     | 4.30     | 0.03          | 0.32          | 0.01                 | 7.85              | 0.41                     | 5.21     | 0.14          | 0.24          | 0.01                 | 6.40              | 0.42                     |
| Q47 | -      | -             | -             | -                    | -                 | -                        | 3.97     | 0.02          | 0.35          | 0.01                 | 21.54             | 0.46                     | 4.34     | 0.09          | 0.22          | 0.01                 | 10.1              | 0.42                     |
| V48 | 4.36   | 0.17          | 0.30          | 0.01                 | 3.52              | 0.65                     | 5.30     | 0.14          | 0.27          | 0.01                 | 6.08              | 0.67                     | 5.62     | 0.14          | 0.23          | 0.01                 | 5.49              | 0.62                     |
| V49 | 4.59   | 0.25          | 0.34          | 0.01                 | 0.63              | 0.69                     | 4.34     | 0.15          | 0.31          | 0.01                 | 2.96              | 0.84                     | 6.42     | 0.27          | 0.26          | 0.01                 | 2.75              | 0.88                     |
| W50 | 5.46   | 0.17          | 0.33          | 0.01                 | 0.77              | 0.53                     | 6.31     | 0.10          | 0.33          | 0.01                 | 2.10              | 0.64                     | -        | -             | -             | -                    | -                 | -                        |
| F51 | 5.16   | 0.23          | 0.33          | 0.01                 | 0.39              | 0.61                     | 5.25     | 0.14          | 0.33          | 0.01                 | 0.96              | 0.88                     | 7.17     | 0.25          | 0.26          | 0.01                 | 1.57              | 0.91                     |
| V52 | 4.49   | 0.20          | 0.34          | 0.01                 | 1.92              | 0.70                     | -        | -             | -             | -                    | -                 | -                        | 6.03     | 0.21          | 0.26          | 0.01                 | 5.69              | 0.69                     |
| L53 | 5.23   | 0.28          | 0.33          | 0.02                 | 3.32              | 0.69                     | -        | -             | -             | -                    | -                 | -                        | 6.18     | 0.29          | 0.26          | 0.01                 | 2.96              | 0.98                     |
| N54 | 4.61   | 0.19          | 0.36          | 0.01                 | 5.63              | 0.54                     | -        | -             | -             | -                    | -                 | -                        | 7.23     | 0.26          | 0.27          | 0.01                 | 3.04              | 0.81                     |
| A55 | 4.95   | 0.23          | 0.31          | 0.01                 | 6.38              | 0.56                     | 5.98     | 0.20          | 0.31          | 0.01                 | 2.26              | 0.88                     | -        | -             | -             | 0                    | -                 | 0                        |
| E56 | 5.47   | 0.16          | 0.33          | 0.01                 | 3.77              | 0.44                     | 6.53     | 0.08          | 0.33          | 0.01                 | 6.15              | 0.59                     | 6.95     | 0.21          | 0.27          | 0.01                 | 7.43              | 0.63                     |
| S57 | 8.96   | 0.63          | 0.30          | 0.01                 | 6.41              | 0.47                     | 8.58     | 0.37          | 0.38          | 0.01                 | 4.71              | 0.97                     | 6.90     | 0.49          | 0.3           | 0.02                 | 5.76              | 1.06                     |
| V59 | 5.80   | 0.45          | 0.35          | 0.02                 | 6.42              | 1.34                     | 6.17     | 0.10          | 0.29          | 0.01                 | 3.62              | 0.68                     | 6.29     | 0.15          | 0.27          | 0.01                 | 7.05              | 0.67                     |
| E60 | 2.66   | 0.14          | 0.36          | 0.01                 | 11.9              | 0.83                     | 2.90     | 0.04          | 0.34          | 0.01                 | 7.21              | 0.82                     | 1.99     | 0.06          | 0.34          | 0.02                 | 17.58             | 0.54                     |
| V61 | 5.04   | 0.42          | 0.34          | 0.02                 | 7.67              | 0.73                     | -        | -             | -             | -                    | -                 | -                        | -        | -             | -             | -                    | -                 | -                        |
| D62 | 4.80   | 0.21          | 0.38          | 0.02                 | 9.14              | 0.95                     | -        | -             | -             | -                    | -                 | -                        | -        | -             | -             | -                    | -                 | -                        |
| T64 | -      | -             | -             | -                    | -                 | -                        | -        | -             | -             | -                    | -                 | -                        | 8.03     | 0.27          | 0.23          | 0.01                 | 1.14              | 0.73                     |
| A65 | 6.24   | 0.50          | 0.35          | 0.01                 | 1.03              | 0.87                     | 4.01     | 0.04          | 0.29          | 0.01                 | 5.26              | 0.72                     | -        | -             | -             | -                    | -                 | -                        |
| L66 | 5.74   | 0.34          | 0.31          | 0.01                 | 4.60              | 0.90                     | 6.46     | 0.34          | 0.30          | 0.01                 | 7.60              | 0.73                     | -        | -             | -             | -                    | -                 | -                        |
| D67 | 4.04   | 0.09          | 0.33          | 0.01                 | 5.09              | 0.42                     | 5.70     | 0.13          | 0.32          | 0.01                 | 4.76              | 0.44                     | 7.75     | 0.28          | 0.28          | 0.01                 | 3.67              | 1.34                     |
| A68 | 4.96   | 0.12          | 0.33          | 0.01                 | 3.25              | 0.45                     | 6.22     | 0.04          | 0.33          | 0.01                 | 3.12              | 0.54                     | 6.69     | 0.34          | 0.26          | 0.01                 | 4.47              | 0.51                     |
| L69 | 4.79   | 0.19          | 0.34          | 0.01                 | 1.01              | 0.69                     | 4.93     | 0.05          | 0.29          | 0.01                 | 3.77              | 0.63                     | -        | -             | -             | -                    | -                 | -                        |
| D70 | 4.75   | 0.18          | 0.31          | 0.01                 | 5.34              | 0.54                     | 3.91     | 0.05          | 0.34          | 0.01                 | 8.21              | 1.29                     | 3.70     | 0.09          | 0.26          | 0.01                 | 3.69              | 0.39                     |
| Q71 | 4.88   | 0.17          | 0.33          | 0.01                 | 3.63              | 0.57                     | 6.82     | 0.07          | 0.32          | 0.01                 | 5.7               | 0.55                     | 8.99     | 0.67          | 0.25          | 0.01                 | 4                 | 0.69                     |
| L72 | 4.74   | 0.28          | 0.36          | 0.02                 | 2.48              | 0.87                     | -        | -             | -             | -                    | -                 | -                        | 6.16     | 0.36          | 0.27          | 0.01                 | 3.36              | 1.15                     |
| R73 | 5.31   | 0.16          | 0.33          | 0.01                 | 3.66              | 0.62                     | 7.13     | 0.12          | 0.31          | 0.01                 | 5.88              | 0.61                     | -        | -             | -             | -                    | -                 | -                        |

| Res  | STAS   |               |               |                      |                   |                          | STAS+GTP |               |               |                      |                   |                          | STAS+GDP |               |               |                      |                   |                          |
|------|--------|---------------|---------------|----------------------|-------------------|--------------------------|----------|---------------|---------------|----------------------|-------------------|--------------------------|----------|---------------|---------------|----------------------|-------------------|--------------------------|
|      | $J(0)$ | $\delta J(0)$ | $J(\omega_N)$ | $\delta J(\omega_N)$ | $J(0.87\omega_H)$ | $\delta J(0.87\omega_H)$ | $J(0)$   | $\delta J(0)$ | $J(\omega_N)$ | $\delta J(\omega_N)$ | $J(0.87\omega_H)$ | $\delta J(0.87\omega_H)$ | $J(0)$   | $\delta J(0)$ | $J(\omega_N)$ | $\delta J(\omega_N)$ | $J(0.87\omega_H)$ | $\delta J(0.87\omega_H)$ |
| T74  | 5.63   | 0.17          | 0.32          | 0.01                 | 4.37              | 0.47                     | 6.96     | 0.13          | 0.31          | 0.01                 | 3.83              | 0.6                      | 7.99     | 0.42          | 0.25          | 0.01                 | 0.58              | 0.65                     |
| E75  | 8.12   | 0.60          | 0.34          | 0.01                 | 2.73              | 0.48                     | 5.61     | 0.09          | 0.32          | 0.01                 | 5.88              | 0.47                     | 7.14     | 0.30          | 0.26          | 0.01                 | 2.59              | 0.63                     |
| L76  | 6.33   | 0.42          | 0.35          | 0.01                 | 8.86              | 1.45                     | 6.22     | 0.04          | 0.38          | 0.01                 | 16.74             | 0.44                     | -        | -             | -             | -                    | -                 | -                        |
| L77  | 4.76   | 0.16          | 0.33          | 0.01                 | 1.91              | 0.43                     | 5.25     | 0.08          | 0.32          | 0.01                 | 0.53              | 0.77                     | 5.48     | 0.16          | 0.27          | 0.01                 | 2                 | 0.67                     |
| R78  | 4.69   | 0.12          | 0.34          | 0.01                 | 1.85              | 0.45                     | 5.29     | 0.07          | 0.33          | 0.01                 | 5.57              | 0.55                     | 7.84     | 0.40          | 0.26          | 0.01                 | 3.12              | 0.51                     |
| R79  | 5.06   | 0.15          | 0.32          | 0.01                 | 2.60              | 0.47                     | 5.54     | 0.06          | 0.32          | 0.01                 | 2.71              | 0.58                     | 7.13     | 0.35          | 0.25          | 0.01                 | 3.06              | 0.62                     |
| G80  | 4.43   | 0.10          | 0.34          | 0.01                 | 1.31              | 0.49                     | 5.39     | 0.09          | 0.32          | 0.01                 | 5.19              | 0.56                     | 6.72     | 0.31          | 0.25          | 0.01                 | 0.94              | 0.50                     |
| I81  | 4.63   | 0.17          | 0.32          | 0.01                 | 1.25              | 0.59                     | 4.63     | 0.08          | 0.34          | 0.01                 | 1.17              | 0.81                     | 5.33     | 0.20          | 0.25          | 0.01                 | 3.28              | 0.92                     |
| V82  | 4.40   | 0.21          | 0.32          | 0.01                 | 2.18              | 0.61                     | 6.95     | 0.25          | 0.34          | 0.01                 | 1.34              | 0.90                     | 5.75     | 0.24          | 0.23          | 0.01                 | 2.30              | 0.87                     |
| F83  | 4.53   | 0.18          | 0.32          | 0.01                 | 3.64              | 0.52                     | 5.35     | 0.09          | 0.33          | 0.01                 | 3.00              | 0.69                     | 5.08     | 0.17          | 0.26          | 0.01                 | 0.52              | 0.73                     |
| A84  | 4.60   | 0.13          | 0.33          | 0.01                 | 2.69              | 0.62                     | 4.90     | 0.08          | 0.33          | 0.01                 | 3.68              | 0.65                     | 6.28     | 0.15          | 0.26          | 0.01                 | 0.28              | 0.62                     |
| M85  | 4.18   | 0.17          | 0.33          | 0.01                 | 3.31              | 0.80                     | 4.70     | 0.13          | 0.31          | 0.01                 | 7.00              | 0.70                     | 6.33     | 0.23          | 0.24          | 0.01                 | 5.06              | 0.76                     |
| A86  | 4.86   | 0.14          | 0.33          | 0.01                 | 0.50              | 0.61                     | 5.88     | 0.12          | 0.28          | 0.01                 | 5.51              | 0.64                     | 6.96     | 0.20          | 0.26          | 0.01                 | 6                 | 0.78                     |
| R87  | 8.76   | 0.69          | 0.32          | 0.01                 | 10.03             | 0.91                     | -        | -             | -             | -                    | -                 | -                        | -        | -             | -             | -                    | -                 | -                        |
| V88  | 6.34   | 0.41          | 0.30          | 0.01                 | 1.80              | 0.85                     | 5.30     | 0.12          | 0.30          | 0.01                 | 4.42              | 0.69                     | 8.06     | 0.46          | 0.23          | 0.01                 | 1.31              | 1.19                     |
| K89  | 6.09   | 0.46          | 0.34          | 0.03                 | 9.06              | 1.55                     | 8.23     | 1.06          | 0.45          | 0.04                 | 9.82              | 2.38                     | -        | -             | -             | -                    | -                 | -                        |
| D91  | 5.73   | 0.17          | 0.36          | 0.01                 | 2.78              | 0.81                     | 6.52     | 0.05          | 0.34          | 0.01                 | 4.52              | 0.49                     | 7.18     | 0.15          | 0.27          | 0.01                 | 4.18              | 0.50                     |
| L92  | 6.75   | 0.42          | 0.33          | 0.02                 | 7.30              | 0.72                     | 7.80     | 0.19          | 0.33          | 0.01                 | 8.03              | 0.92                     | -        | -             | -             | -                    | -                 | -                        |
| R93  | -      | -             | -             | -                    | -                 | -                        | 11.79    | 0.79          | 0.36          | 0.03                 | 8.53              | 1.57                     | 3.04     | 0.20          | 0.28          | 0.02                 | 3.77              | 1.65                     |
| E94  | 5.62   | 0.40          | 0.34          | 0.02                 | 4.14              | 0.82                     | 6.35     | 0.18          | 0.36          | 0.01                 | 1.83              | 0.97                     | 7.11     | 0.29          | 0.30          | 0.01                 | 0.64              | 1.08                     |
| L96  | 5.56   | 0.41          | 0.33          | 0.02                 | 3.60              | 1.35                     | 11.25    | 0.35          | 0.34          | 0.02                 | 5.16              | 1.15                     | 3.69     | 0.06          | 0.34          | 0.02                 | 8.51              | 1.02                     |
| R97  | 9.33   | 0.61          | 0.34          | 0.01                 | 3.68              | 1.43                     | -        | -             | -             | -                    | -                 | -                        | 5.40     | 0.44          | 0.30          | 0.02                 | 0.52              | 1.20                     |
| A98  | 6.66   | 0.46          | 0.34          | 0.02                 | 5.57              | 1.23                     | -        | -             | -             | -                    | -                 | -                        | 5.74     | 0.37          | 0.29          | 0.02                 | 0.87              | 1.74                     |
| A99  | 5.52   | 0.28          | 0.31          | 0.01                 | 4.97              | 0.53                     | 6.58     | 0.14          | 0.33          | 0.01                 | 3.21              | 0.73                     | 8.07     | 0.30          | 0.26          | 0.01                 | 0.05              | 0.88                     |
| S100 | 4.79   | 0.13          | 0.37          | 0.01                 | 1.47              | 0.56                     | 5.75     | 0.08          | 0.33          | 0.01                 | 4.13              | 0.49                     | 6.96     | 0.23          | 0.25          | 0.01                 | 5.47              | 0.53                     |
| L101 | 9.59   | 0.70          | 0.32          | 0.01                 | 4.55              | 0.86                     | -        | -             | -             | -                    | -                 | -                        | -        | -             | -             | -                    | -                 | -                        |
| L102 | 7.56   | 0.58          | 0.32          | 0.02                 | 6.62              | 1.28                     | -        | -             | -             | -                    | -                 | -                        | -        | -             | -             | -                    | -                 | -                        |
| D103 | 7.74   | 0.30          | 0.37          | 0.01                 | 3.39              | 2.06                     | 4.28     | 0.03          | 0.30          | 0.01                 | 5.75              | 0.54                     | 8.6      | 0.52          | 0.26          | 0.01                 | 1.80              | 0.61                     |
| K104 | 4.70   | 0.24          | 0.32          | 0.02                 | 2.01              | 1.08                     | 5.4      | 0.15          | 0.27          | 0.01                 | 2.68              | 1.05                     | 6.96     | 0.34          | 0.23          | 0.01                 | 5.26              | 1.06                     |
| I105 | 5.34   | 0.27          | 0.31          | 0.01                 | 5.91              | 0.58                     | 5.44     | 0.12          | 0.30          | 0.01                 | 1.00              | 1.03                     | 5.55     | 0.23          | 0.25          | 0.01                 | 4.86              | 0.83                     |
| G106 | -      | -             | -             | -                    | -                 | -                        | 7.38     | 0.21          | 0.27          | 0.01                 | 1.58              | 0.46                     | 7.26     | 0.24          | 0.22          | 0.01                 | 2.93              | 0.70                     |
| E107 | -      | -             | -             | -                    | -                 | -                        | 6.95     | 0.20          | 0.30          | 0.01                 | 3.31              | 0.62                     | 9.29     | 0.39          | 0.24          | 0.01                 | 4.85              | 0.97                     |
| D108 | 4.54   | 0.1           | 0.36          | 0.01                 | 2.93              | 0.59                     | 5.66     | 0.05          | 0.33          | 0.01                 | 5.74              | 0.41                     | 6.22     | 0.10          | 0.27          | 0.01                 | 3.03              | 0.42                     |

| Res  | STAS   |               |               |                      |                   |                          | STAS+GTP |               |               |                      |                   |                          | STAS+GDP |               |               |                      |                   |                          |
|------|--------|---------------|---------------|----------------------|-------------------|--------------------------|----------|---------------|---------------|----------------------|-------------------|--------------------------|----------|---------------|---------------|----------------------|-------------------|--------------------------|
|      | $J(0)$ | $\delta J(0)$ | $J(\omega_N)$ | $\delta J(\omega_N)$ | $J(0.87\omega_H)$ | $\delta J(0.87\omega_H)$ | $J(0)$   | $\delta J(0)$ | $J(\omega_N)$ | $\delta J(\omega_N)$ | $J(0.87\omega_H)$ | $\delta J(0.87\omega_H)$ | $J(0)$   | $\delta J(0)$ | $J(\omega_N)$ | $\delta J(\omega_N)$ | $J(0.87\omega_H)$ | $\delta J(0.87\omega_H)$ |
| H109 | 5.27   | 0.26          | 0.34          | 0.02                 | 1.54              | 0.72                     | 4.96     | 0.11          | 0.33          | 0.01                 | 1.81              | 1.56                     | 6.14     | 0.20          | 0.29          | 0.01                 | 0.24              | 0.81                     |
| I110 | 4.14   | 0.12          | 0.33          | 0.01                 | 2.80              | 0.51                     | 4.95     | 0.05          | 0.31          | 0.01                 | 2.73              | 0.67                     | 6.60     | 0.34          | 0.24          | 0.01                 | 5.30              | 0.51                     |
| F111 | 4.50   | 0.20          | 0.33          | 0.01                 | 2.42              | 0.68                     | -        | -             | -             | -                    | -                 | -                        | 6.49     | 0.25          | 0.25          | 0.01                 | 0.39              | 0.90                     |
| T113 | 4.63   | 0.12          | 0.32          | 0.01                 | 4.55              | 0.48                     | 6.46     | 0.05          | 0.33          | 0.01                 | 2.83              | 0.54                     | 6.35     | 0.31          | 0.24          | 0.01                 | 0.64              | 0.53                     |
| L114 | 6.88   | 0.58          | 0.37          | 0.02                 | 2.78              | 1.94                     | 4.56     | 0.11          | 0.34          | 0.01                 | 5.46              | 0.97                     | 7.30     | 0.31          | 0.30          | 0.02                 | 1.45              | 1.26                     |
| T116 | 4.97   | 0.16          | 0.35          | 0.01                 | 2.04              | 0.61                     | 6.08     | 0.08          | 0.31          | 0.01                 | 1.47              | 0.52                     | 7.13     | 0.28          | 0.25          | 0.01                 | 1.69              | 0.57                     |
| A117 | 4.83   | 0.14          | 0.35          | 0.01                 | 4.86              | 0.50                     | 5.91     | 0.09          | 0.36          | 0.01                 | 3.55              | 0.65                     | 7.56     | 0.33          | 0.27          | 0.01                 | 1.13              | 0.67                     |
| V118 | 4.57   | 0.21          | 0.34          | 0.01                 | 4.59              | 0.62                     | 6.05     | 0.12          | 0.30          | 0.01                 | 4.51              | 0.6                      | 6.93     | 0.22          | 0.26          | 0.01                 | 0.12              | 0.79                     |
| Q119 | 9      | 0.75          | 0.29          | 0.01                 | 7.27              | 0.48                     | -        | -             | -             | -                    | -                 | -                        | -        | -             | -             | -                    | -                 | -                        |
| A120 | 4.92   | 0.11          | 0.33          | 0.01                 | 3.17              | 0.43                     | 5.97     | 0.07          | 0.32          | 0.01                 | 3.33              | 0.52                     | -        | -             | -             | -                    | -                 | -                        |
| F121 | 5      | 0.18          | 0.33          | 0.01                 | 4.56              | 0.53                     | -        | -             | -             | -                    | -                 | -                        | -        | -             | -             | -                    | -                 | -                        |
| R122 | 5.28   | 0.16          | 0.34          | 0.01                 | 3.12              | 0.46                     | -        | -             | -             | -                    | -                 | -                        | 7.71     | 0.44          | 0.26          | 0.01                 | 4.62              | 0.51                     |
| R123 | 3.97   | 0.12          | 0.32          | 0.01                 | 5.71              | 0.46                     | 5.07     | 0.08          | 0.31          | 0.01                 | 2.02              | 0.60                     | 6.24     | 0.26          | 0.25          | 0.01                 | 4.20              | 0.61                     |
| R124 | 4.43   | 0.12          | 0.35          | 0.01                 | 3.04              | 0.53                     | 5.94     | 0.06          | 0.32          | 0.01                 | 4.64              | 0.61                     | 7.06     | 0.29          | 0.26          | 0.01                 | 2.72              | 0.56                     |



Table S5:  $^{15}\text{N}$  relaxation rates  $R_1$  ( $\text{sec}^{-1}$ ),  $R_2$  ( $\text{sec}^{-1}$ ),  $\{^1\text{H}\}$ - $^{15}\text{N}$  heteronuclear NOEs recorded at 600.13 MHz, 300 K, generalized order parameters ( $S^2$ ), and estimated reduced spectral density function parameters  $\{J(0)$  (ns/rad),  $J(\omega_{\text{N}})$  (ns/rad), and  $J(0.87\omega_{\text{H}})$  (ps/rad) $\}$  of each secondary-structured segment of Rv1739c STAS. Symbols  $\alpha$ ,  $\beta$ , and L represent helix, strand and loop structures followed by their number in sequence from N-terminus.

| structural segment | residue range | $R_1$           | $R_2$            | $NOE$           | $S^2$           | $J(0)$          | $J(\omega_{\text{N}})$ | $J(0.87\omega_{\text{H}})$ |
|--------------------|---------------|-----------------|------------------|-----------------|-----------------|-----------------|------------------------|----------------------------|
| L1                 | 1-15          | $1.52 \pm 0.05$ | $8.06 \pm 0.24$  | $0.55 \pm 0.03$ | $0.50 \pm 0.02$ | $3.13 \pm 0.11$ | $0.36 \pm 0.01$        | $10.85 \pm 0.78$           |
| $\beta$ 1          | 16-20         | $1.34 \pm 0.05$ | $12.31 \pm 0.55$ | $0.89 \pm 0.04$ | $0.93 \pm 0.03$ | $4.44 \pm 0.21$ | $0.34 \pm 0.01$        | $2.41 \pm 0.76$            |
| L2                 | 21-29         | $1.37 \pm 0.06$ | $17.97 \pm 1.27$ | $0.76 \pm 0.05$ | $0.92 \pm 0.03$ | $5.61 \pm 0.34$ | $0.33 \pm 0.02$        | $5.09 \pm 0.83$            |
| $\alpha$ 1         | 30-42         | $1.30 \pm 0.04$ | $13.77 \pm 0.47$ | $0.82 \pm 0.29$ | $0.90 \pm 0.02$ | $5.00 \pm 0.18$ | $0.32 \pm 0.01$        | $3.61 \pm 0.60$            |
| L3                 | 43-49         | $1.29 \pm 0.03$ | $11.00 \pm 0.31$ | $0.79 \pm 0.03$ | $0.86 \pm 0.02$ | $4.39 \pm 0.14$ | $0.32 \pm 0.01$        | $4.22 \pm 0.51$            |
| $\beta$ 2          | 50-54         | $1.34 \pm 0.05$ | $13.76 \pm 0.56$ | $0.89 \pm 0.03$ | $0.92 \pm 0.03$ | $4.99 \pm 0.21$ | $0.34 \pm 0.01$        | $2.41 \pm 0.61$            |
| L4                 | 55-64         | $1.38 \pm 0.06$ | $18.77 \pm 1.20$ | $0.70 \pm 0.04$ | $0.85 \pm 0.03$ | $5.38 \pm 0.32$ | $0.34 \pm 0.02$        | $7.38 \pm 0.76$            |
| $\alpha$ 2         | 65-77         | $1.34 \pm 0.04$ | $14.85 \pm 0.68$ | $0.82 \pm 0.03$ | $0.92 \pm 0.02$ | $5.41 \pm 0.26$ | $0.33 \pm 0.01$        | $3.69 \pm 0.67$            |
| L5                 | 78-80         | $1.32 \pm 0.03$ | $13.06 \pm 0.33$ | $0.91 \pm 0.02$ | $0.93 \pm 0.02$ | $4.73 \pm 0.12$ | $0.33 \pm 0.01$        | $1.92 \pm 0.47$            |
| $\beta$ 3          | 81-86         | $1.30 \pm 0.04$ | $12.55 \pm 0.45$ | $0.89 \pm 0.03$ | $0.88 \pm 0.02$ | $4.53 \pm 0.17$ | $0.33 \pm 0.01$        | $2.26 \pm 0.63$            |
| L6                 | 87-90         | $1.32 \pm 0.07$ | $19.21 \pm 1.37$ | $0.67 \pm 0.05$ | $0.92 \pm 0.03$ | $7.06 \pm 0.52$ | $0.32 \pm 0.02$        | $6.97 \pm 1.10$            |
| $\alpha$ 3         | 91-99         | $1.35 \pm 0.06$ | $18.98 \pm 1.15$ | $0.82 \pm 0.05$ | $0.97 \pm 0.03$ | $6.45 \pm 0.39$ | $0.34 \pm 0.02$        | $4.58 \pm 0.99$            |
| L7                 | 100-101       | $1.38 \pm 0.05$ | $19.55 \pm 1.09$ | $0.86 \pm 0.03$ | -               | $7.19 \pm 0.41$ | $0.34 \pm 0.01$        | $3.01 \pm 0.71$            |
| $\alpha$ 4         | 102-105       | $1.33 \pm 0.06$ | $17.29 \pm 0.92$ | $0.78 \pm 0.06$ | $0.88 \pm 0.03$ | $6.34 \pm 0.35$ | $0.33 \pm 0.02$        | $3.59 \pm 1.00$            |
| L8                 | 106-109       | $1.34 \pm 0.05$ | $17.10 \pm 0.89$ | $0.85 \pm 0.04$ | $0.93 \pm 0.02$ | $4.91 \pm 0.18$ | $0.35 \pm 0.01$        | $2.24 \pm 0.66$            |
| $\beta$ 4          | 110-111       | $1.33 \pm 0.04$ | $11.99 \pm 0.42$ | $0.87 \pm 0.03$ | $0.88 \pm 0.02$ | $4.32 \pm 0.16$ | $0.33 \pm 0.01$        | $2.61 \pm 0.60$            |
| L9                 | 112-113       | $1.30 \pm 0.03$ | $12.79 \pm 0.34$ | $0.78 \pm 0.02$ | $0.89 \pm 0.02$ | $4.63 \pm 0.13$ | $0.32 \pm 0.01$        | $4.55 \pm 0.48$            |
| $\alpha$ 5         | 114-121       | $1.37 \pm 0.05$ | $15.74 \pm 0.79$ | $0.80 \pm 0.03$ | $0.95 \pm 0.02$ | $5.74 \pm 0.31$ | $0.34 \pm 0.01$        | $4.18 \pm 0.73$            |
| L10                | 122-124       | $1.37 \pm 0.04$ | $12.66 \pm 0.35$ | $0.81 \pm 0.02$ | $0.87 \pm 0.02$ | $4.56 \pm 0.14$ | $0.34 \pm 0.01$        | $3.96 \pm 0.48$            |

Table S6:  $^{15}\text{N}$  relaxation rates  $R_1$  ( $\text{sec}^{-1}$ ),  $R_2$  ( $\text{sec}^{-1}$ ),  $\{^1\text{H}\}$ - $^{15}\text{N}$  heteronuclear NOEs recorded at 600.13 MHz, 300 K, and reduced spectral density function parameters  $\{J(0)$  (ns/rad),  $J(\omega_{\text{N}})$  (ns/rad), and  $J(0.87\omega_{\text{H}})$  (ps/rad) $\}$  of each secondary-structured segment of Rv1739c STAS in the presence of 20 mM GTP.

| structural segment | residue range | $R_1$           | $R_2$            | $NOE$           | $J(0)$          | $J(\omega_{\text{N}})$ | $J(0.87\omega_{\text{H}})$ |
|--------------------|---------------|-----------------|------------------|-----------------|-----------------|------------------------|----------------------------|
| L1                 | 1-15          | $1.41 \pm 0.04$ | $8.35 \pm 0.12$  | $0.49 \pm 0.03$ | $3.16 \pm 0.03$ | $0.33 \pm 0.01$        | $11.76 \pm 0.55$           |
| $\beta$ 1          | 16-20         | $1.32 \pm 0.06$ | $14.81 \pm 0.45$ | $0.91 \pm 0.04$ | $5.27 \pm 0.12$ | $0.33 \pm 0.01$        | $2.36 \pm 0.91$            |
| L2                 | 21-29         | $1.11 \pm 0.05$ | $19.09 \pm 0.96$ | $0.79 \pm 0.06$ | $8.16 \pm 0.38$ | $0.29 \pm 0.01$        | $6.23 \pm 0.85$            |
| $\alpha$ 1         | 30-42         | $1.17 \pm 0.04$ | $16.98 \pm 0.80$ | $0.76 \pm 0.03$ | $6.25 \pm 0.14$ | $0.29 \pm 0.01$        | $4.33 \pm 0.63$            |
| L3                 | 43-49         | $1.28 \pm 0.04$ | $13.19 \pm 0.38$ | $0.59 \pm 0.03$ | $4.78 \pm 0.07$ | $0.31 \pm 0.01$        | $8.58 \pm 0.54$            |
| $\beta$ 2          | 50-54         | $1.30 \pm 0.06$ | $14.16 \pm 0.41$ | $1.02 \pm 0.04$ | $5.78 \pm 0.12$ | $0.33 \pm 0.01$        | $1.53 \pm 0.76$            |
| L4                 | 55-64         | $1.35 \pm 0.06$ | $16.96 \pm 0.55$ | $0.75 \pm 0.04$ | $6.03 \pm 0.16$ | $0.33 \pm 0.01$        | $4.79 \pm 0.79$            |
| $\alpha$ 2         | 65-77         | $1.33 \pm 0.05$ | $16.15 \pm 0.64$ | $0.76 \pm 0.04$ | $5.77 \pm 0.98$ | $0.32 \pm 0.01$        | $5.94 \pm 0.65$            |
| L5                 | 78-80         | $1.31 \pm 0.04$ | $14.85 \pm 0.52$ | $0.78 \pm 0.03$ | $5.41 \pm 0.07$ | $0.32 \pm 0.01$        | $4.49 \pm 0.56$            |
| $\beta$ 3          | 81-86         | $1.30 \pm 0.06$ | $14.82 \pm 0.44$ | $0.82 \pm 0.04$ | $5.40 \pm 0.13$ | $0.32 \pm 0.01$        | $3.62 \pm 0.73$            |
| L6                 | 87-90         | $1.35 \pm 0.09$ | $18.01 \pm 1.49$ | $0.82 \pm 0.07$ | $6.77 \pm 0.59$ | $0.38 \pm 0.03$        | $7.12 \pm 1.54$            |
| $\alpha$ 3         | 91-99         | $1.36 \pm 0.07$ | $18.96 \pm 0.82$ | $0.83 \pm 0.05$ | $8.38 \pm 0.28$ | $0.34 \pm 0.01$        | $5.21 \pm 0.97$            |
| L7                 | 100-101       | $1.33 \pm 0.06$ | $15.76 \pm 0.53$ | $0.73 \pm 0.04$ | $5.75 \pm 0.08$ | $0.33 \pm 0.01$        | $4.13 \pm 0.49$            |
| $\alpha$ 4         | 102-105       | $1.16 \pm 0.06$ | $16.69 \pm 0.74$ | $0.83 \pm 0.05$ | $5.04 \pm 0.10$ | $0.29 \pm 0.01$        | $3.14 \pm 0.88$            |
| L8                 | 106-109       | $1.24 \pm 0.05$ | $16.98 \pm 0.52$ | $0.84 \pm 0.04$ | $6.24 \pm 0.14$ | $0.31 \pm 0.01$        | $3.11 \pm 0.76$            |
| $\beta$ 4          | 110-111       | $1.24 \pm 0.06$ | $14.06 \pm 0.51$ | $0.99 \pm 0.05$ | $4.95 \pm 0.05$ | $0.31 \pm 0.01$        | $2.73 \pm 0.67$            |
| L9                 | 112-113       | $1.31 \pm 0.04$ | $17.60 \pm 0.54$ | $0.86 \pm 0.03$ | $6.46 \pm 0.05$ | $0.33 \pm 0.01$        | $2.83 \pm 0.54$            |
| $\alpha$ 5         | 114-121       | $1.30 \pm 0.06$ | $13.80 \pm 0.43$ | $0.82 \pm 0.03$ | $6.23 \pm 0.14$ | $0.33 \pm 0.01$        | $3.67 \pm 0.65$            |
| L10                | 122-124       | $1.29 \pm 0.05$ | $14.68 \pm 0.51$ | $0.90 \pm 0.03$ | $5.83 \pm 0.16$ | $0.32 \pm 0.01$        | $3.33 \pm 0.61$            |

Table S7:  $^{15}\text{N}$  relaxation rates  $R_1$  ( $\text{sec}^{-1}$ ),  $R_2$  ( $\text{sec}^{-1}$ ),  $\{^1\text{H}\}$ - $^{15}\text{N}$  heteronuclear NOEs recorded at 600.13 MHz, 300 K, and reduced spectral density function parameters  $\{J(0)$  (ns/rad),  $J(\omega_{\text{N}})$  (ns/rad), and  $J(0.87\omega_{\text{H}})$  (ps/rad) $\}$  of each secondary structured segment of Rv1739c STAS in the presence of 20 mM GDP.

| structural segment | residue range | $R_1$           | $R_2$            | $NOE$           | $J(0)$          | $J(\omega_{\text{N}})$ | $J(0.87\omega_{\text{H}})$ |
|--------------------|---------------|-----------------|------------------|-----------------|-----------------|------------------------|----------------------------|
| L1                 | 1-15          | $1.29 \pm 0.03$ | $10.07 \pm 0.18$ | $0.46 \pm 0.04$ | $3.58 \pm 0.07$ | $0.30 \pm 0.01$        | $11.42 \pm 0.74$           |
| $\beta$ 1          | 16-20         | $1.05 \pm 0.04$ | $16.57 \pm 0.55$ | $0.74 \pm 0.05$ | $6.12 \pm 0.21$ | $0.26 \pm 0.01$        | $4.26 \pm 0.76$            |
| L2                 | 21-29         | $1.03 \pm 0.05$ | $20.35 \pm 1.71$ | $0.72 \pm 0.08$ | $7.77 \pm 0.63$ | $0.26 \pm 0.01$        | $3.60 \pm 1.05$            |
| $\alpha$ 1         | 30-42         | $1.01 \pm 0.03$ | $18.13 \pm 1.08$ | $0.79 \pm 0.05$ | $6.49 \pm 0.30$ | $0.24 \pm 0.01$        | $4.37 \pm 0.58$            |
| L3                 | 43-49         | $0.99 \pm 0.03$ | $15.32 \pm 0.47$ | $0.68 \pm 0.04$ | $5.65 \pm 0.18$ | $0.24 \pm 0.01$        | $4.81 \pm 0.54$            |
| $\beta$ 2          | 50-54         | $1.06 \pm 0.04$ | $18.55 \pm 0.65$ | $0.85 \pm 0.05$ | $6.65 \pm 0.25$ | $0.26 \pm 0.01$        | $3.31 \pm 0.85$            |
| L4                 | 55-64         | $1.14 \pm 0.05$ | $18.87 \pm 1.04$ | $0.66 \pm 0.06$ | $6.03 \pm 0.24$ | $0.28 \pm 0.01$        | $7.79 \pm 0.73$            |
| $\alpha$ 2         | 65-77         | $1.08 \pm 0.03$ | $20.94 \pm 1.01$ | $0.86 \pm 0.05$ | $6.74 \pm 0.33$ | $0.26 \pm 0.01$        | $3.05 \pm 0.75$            |
| L5                 | 78-80         | $1.02 \pm 0.02$ | $19.47 \pm 0.91$ | $0.85 \pm 0.03$ | $7.23 \pm 0.35$ | $0.25 \pm 0.01$        | $2.37 \pm 0.54$            |
| $\beta$ 3          | 81-86         | $1.01 \pm 0.03$ | $16.13 \pm 0.52$ | $0.82 \pm 0.05$ | $5.96 \pm 0.20$ | $0.25 \pm 0.01$        | $2.91 \pm 0.78$            |
| L6                 | 87-90         | $1.01 \pm 0.06$ | $20.47 \pm 1.93$ | $1.15 \pm 0.18$ | $8.06 \pm 0.46$ | $0.23 \pm 0.01$        | $1.31 \pm 1.19$            |
| $\alpha$ 3         | 91-99         | $1.15 \pm 0.05$ | $17.23 \pm 0.82$ | $0.86 \pm 0.07$ | $5.75 \pm 0.26$ | $0.29 \pm 0.01$        | $2.65 \pm 1.15$            |
| L7                 | 100-101       | $1.09 \pm 0.05$ | $18.78 \pm 0.61$ | $0.86 \pm 0.06$ | $6.96 \pm 0.23$ | $0.25 \pm 0.01$        | $5.47 \pm 0.53$            |
| $\alpha$ 4         | 102-105       | $1.01 \pm 0.05$ | $17.09 \pm 1.09$ | $0.75 \pm 0.05$ | $7.04 \pm 0.36$ | $0.25 \pm 0.01$        | $3.97 \pm 0.84$            |
| L8                 | 106-109       | $1.04 \pm 0.03$ | $19.48 \pm 0.62$ | $0.82 \pm 0.04$ | $7.23 \pm 0.23$ | $0.26 \pm 0.01$        | $2.76 \pm 0.73$            |
| $\beta$ 4          | 110-111       | $1.00 \pm 0.03$ | $17.67 \pm 0.78$ | $0.82 \pm 0.05$ | $6.55 \pm 0.29$ | $0.25 \pm 0.01$        | $2.85 \pm 0.71$            |
| L9                 | 112-113       | $0.96 \pm 0.02$ | $17.12 \pm 0.80$ | $0.96 \pm 0.04$ | $6.35 \pm 0.32$ | $0.24 \pm 0.01$        | $0.64 \pm 0.53$            |
| $\alpha$ 5         | 114-121       | $1.05 \pm 0.03$ | $19.76 \pm 0.84$ | $0.92 \pm 0.05$ | $7.23 \pm 0.28$ | $0.27 \pm 0.01$        | $1.10 \pm 0.82$            |
| L10                | 122-124       | $1.04 \pm 0.02$ | $18.89 \pm 0.87$ | $0.79 \pm 0.06$ | $7.01 \pm 0.33$ | $0.26 \pm 0.01$        | $3.85 \pm 0.56$            |
